# Supplementary material for: Environmental characteristics around the household and their association with hookworm infection in rural communities from Bahir Dar, Amhara Region, Ethiopia
Source: PubMed Central journal article supplement (PMC8219153; doi:10.1371/journal.pntd.0009466), 2021-06-22

# PLOS Neglected Tropical Diseases

## Environmental characteristics around the household and their association with hookworm infection in rural communities from Bahir Dar, Amhara Region, Ethiopia --Manuscript Draft--

|                                                                                                                                                                                                                                                                                                                                                                                                                                                                                               |                                                                                                                                                                                                                                                                                                                                                                                                                                                                                                                                                                                                                                                                                                                                                                                                                                                                                                                                                                                                                                                                                                                                                                                                                                                                                                                                                                                                                                                                                                                                                                                                                                                             |
|-----------------------------------------------------------------------------------------------------------------------------------------------------------------------------------------------------------------------------------------------------------------------------------------------------------------------------------------------------------------------------------------------------------------------------------------------------------------------------------------------|-------------------------------------------------------------------------------------------------------------------------------------------------------------------------------------------------------------------------------------------------------------------------------------------------------------------------------------------------------------------------------------------------------------------------------------------------------------------------------------------------------------------------------------------------------------------------------------------------------------------------------------------------------------------------------------------------------------------------------------------------------------------------------------------------------------------------------------------------------------------------------------------------------------------------------------------------------------------------------------------------------------------------------------------------------------------------------------------------------------------------------------------------------------------------------------------------------------------------------------------------------------------------------------------------------------------------------------------------------------------------------------------------------------------------------------------------------------------------------------------------------------------------------------------------------------------------------------------------------------------------------------------------------------|
| <b>Manuscript Number:</b>                                                                                                                                                                                                                                                                                                                                                                                                                                                                     | PNTD-D-21-00055                                                                                                                                                                                                                                                                                                                                                                                                                                                                                                                                                                                                                                                                                                                                                                                                                                                                                                                                                                                                                                                                                                                                                                                                                                                                                                                                                                                                                                                                                                                                                                                                                                             |
| <b>Full Title:</b>                                                                                                                                                                                                                                                                                                                                                                                                                                                                            | Environmental characteristics around the household and their association with hookworm infection in rural communities from Bahir Dar, Amhara Region, Ethiopia                                                                                                                                                                                                                                                                                                                                                                                                                                                                                                                                                                                                                                                                                                                                                                                                                                                                                                                                                                                                                                                                                                                                                                                                                                                                                                                                                                                                                                                                                               |
| <b>Short Title:</b>                                                                                                                                                                                                                                                                                                                                                                                                                                                                           | Hookworm infection and environmental characteristics around households                                                                                                                                                                                                                                                                                                                                                                                                                                                                                                                                                                                                                                                                                                                                                                                                                                                                                                                                                                                                                                                                                                                                                                                                                                                                                                                                                                                                                                                                                                                                                                                      |
| <b>Article Type:</b>                                                                                                                                                                                                                                                                                                                                                                                                                                                                          | Research Article                                                                                                                                                                                                                                                                                                                                                                                                                                                                                                                                                                                                                                                                                                                                                                                                                                                                                                                                                                                                                                                                                                                                                                                                                                                                                                                                                                                                                                                                                                                                                                                                                                            |
| <b>Keywords:</b>                                                                                                                                                                                                                                                                                                                                                                                                                                                                              | Soil-transmitted helminths, hookworm, geographic information systems, remote sensing, environmental characteristics                                                                                                                                                                                                                                                                                                                                                                                                                                                                                                                                                                                                                                                                                                                                                                                                                                                                                                                                                                                                                                                                                                                                                                                                                                                                                                                                                                                                                                                                                                                                         |
| <b>Abstract:</b>                                                                                                                                                                                                                                                                                                                                                                                                                                                                              | <p>Soil-Transmitted Helminths (STH) are highly prevalent Neglected Tropical Disease in Ethiopia, an estimated 26 million are infected. Geographic Information Systems and Remote Sensing (RS) technologies assist data mapping and analysis, and the prediction of the spatial distribution of infection in relation to environmental variables. The influence of socioeconomic, environmental and soil characteristics on hookworm infection at the individual and household level is explored in order to identify spatial patterns of infection in rural villages from Zenzelema (Amhara region). Inhabitants greater than 5 years old were recruited in order to assess the presence of STH. Socioeconomic and hookworm infection variables at the household level and environmental variables and soil characteristics using RS were obtained. The dominant STH found was hookworm. Individuals which practiced open defecation and those without electricity had a significant higher number of hookworm eggs in their stool. Additionally, adults showed statistically higher hookworm egg counts than children. Nonetheless, the probability of hookworm infection was not determined by socioeconomic conditions but by environmental characteristics surrounding the households, including a combination of vigorous vegetation and bare soil, high temperatures, and compacted soils (high bulk density) with more acidic pH. The identification of high-risk environmental areas provides a useful tool for planning, targeting and monitoring of control measures, including not only children but also adults when hookworm is concerned.</p> |
| <b>Additional Information:</b>                                                                                                                                                                                                                                                                                                                                                                                                                                                                |                                                                                                                                                                                                                                                                                                                                                                                                                                                                                                                                                                                                                                                                                                                                                                                                                                                                                                                                                                                                                                                                                                                                                                                                                                                                                                                                                                                                                                                                                                                                                                                                                                                             |
| <b>Question</b>                                                                                                                                                                                                                                                                                                                                                                                                                                                                               | <b>Response</b>                                                                                                                                                                                                                                                                                                                                                                                                                                                                                                                                                                                                                                                                                                                                                                                                                                                                                                                                                                                                                                                                                                                                                                                                                                                                                                                                                                                                                                                                                                                                                                                                                                             |
| <b>Financial Disclosure</b><br><br>Enter a financial disclosure statement that describes the sources of funding for the work included in this submission. Review the <a href="#">submission guidelines</a> for detailed requirements. View published research articles from <a href="#">PLOS NTDs</a> for specific examples.<br><br>This statement is required for submission and <b>will appear in the published article</b> if the submission is accepted. Please make sure it is accurate. | The authors received no specific funding for this work.                                                                                                                                                                                                                                                                                                                                                                                                                                                                                                                                                                                                                                                                                                                                                                                                                                                                                                                                                                                                                                                                                                                                                                                                                                                                                                                                                                                                                                                                                                                                                                                                     |

### Unfunded studies

Enter: *The author(s) received no specific funding for this work.*

### Funded studies

Enter a statement with the following details:

- Initials of the authors who received each award
- Grant numbers awarded to each author
- The full name of each funder
- URL of each funder website
- Did the sponsors or funders play any role in the study design, data collection and analysis, decision to publish, or preparation of the manuscript?
- **NO** - Include this sentence at the end of your statement: *The funders had no role in study design, data collection and analysis, decision to publish, or preparation of the manuscript.*
- **YES** - Specify the role(s) played.

\* typeset

### Competing Interests

Use the instructions below to enter a competing interest statement for this submission. On behalf of all authors, disclose any [competing interests](#) that could be perceived to bias this work—acknowledging all financial support and any other relevant financial or non-financial competing interests.

This statement **will appear in the published article** if the submission is accepted. Please make sure it is accurate. View published research articles from [PLOS NTDs](#) for specific examples.

The authors have declared that no competing interests exist.

**NO authors have competing interests**

Enter: *The authors have declared that no competing interests exist.*

**Authors with competing interests**

Enter competing interest details beginning with this statement:

*I have read the journal's policy and the authors of this manuscript have the following competing interests: [insert competing interests here]*

\* typeset

This statement is **required** for submission and **will appear in the published article** if the submission is accepted. Please make sure it is accurate and that any funding sources listed in your Funding Information later in the submission form are also declared in your Financial Disclosure statement.

**Data Availability**

Authors are required to make all data underlying the findings described fully available, without restriction, and from the time of publication. PLOS allows rare exceptions to address legal and ethical concerns. See the [PLOS Data Policy](#) and [FAQ](#) for detailed information.

Yes - all data are fully available without restriction

A Data Availability Statement describing where the data can be found is required at submission. Your answers to this question constitute the Data Availability Statement and **will be published in the article**, if accepted.

**Important:** Stating 'data available on request from the author' is not sufficient. If your data are only available upon request, select 'No' for the first question and explain your exceptional situation in the text box.

Do the authors confirm that all data underlying the findings described in their manuscript are fully available without restriction?

**Describe where the data may be found in full sentences. If you are copying our sample text, replace any instances of XXX with the appropriate details.**

- If the data are **held or will be held in a public repository**, include URLs, accession numbers or DOIs. If this information will only be available after acceptance, indicate this by ticking the box below. For example: *All XXX files are available from the XXX database (accession number(s) XXX, XXX).*
- If the data are all contained **within the manuscript and/or Supporting Information files**, enter the following: *All relevant data are within the manuscript and its Supporting Information files.*
- If neither of these applies but you are able to provide **details of access elsewhere**, with or without limitations, please do so. For example:

*Data cannot be shared publicly because*

All relevant data are within the manuscript and its Supporting Information files.

of [XXX]. Data are available from the XXX Institutional Data Access / Ethics Committee (contact via XXX) for researchers who meet the criteria for access to confidential data.

The data underlying the results presented in the study are available from (include the name of the third party and contact information or URL).

- This text is appropriate if the data are owned by a third party and authors do not have permission to share the data.

\* typeset

Additional data availability information:

Tick here if the URLs/accession numbers/DOIs will be available only after acceptance of the manuscript for publication so that we can ensure their inclusion before publication.

1 **Title**

2 Environmental characteristics around the household and their association with hookworm infection in  
3 rural communities from Bahir Dar, Amhara Region, Ethiopia

4 **Short Title**

5 Hookworm infection and environmental characteristics around households

6 **Authors and affiliations**

7 Melaku Anegagrie<sup>1,2,+</sup>, Sofia Lanfri<sup>3,4,+</sup>, Aranzazu Amor Aramendia<sup>1,2</sup>, Carlos Matías Scavuzzo<sup>3,5</sup>, Zaida  
8 Herrador<sup>2</sup>, Agustín Benito<sup>2</sup>, Maria Victoria Periago<sup>4\*</sup>.

9 1 Fundación Mundo Sano, Calle Recaredo 3, Madrid, 28002, Spain

10 2 National Centre for Tropical Medicine, Institute of Health Carlos III, Ctra. de Pozuelo 28, Majadahonda,  
11 Madrid, 28222, Spain

12 3 Instituto Gulich, CONAE, UNC, Ruta Provincial C45 a 8 Km, Falda del Cañete, Córdoba, (CP5187)  
13 Argentina

14 4 Fundación Mundo Sano, Paraguay 1535, Buenos Aires, (CP1061) Argentina

15 5 Consejo Nacional de Investigaciones Científicas y Técnicas (CONICET), Godoy Cruz 2290, Buenos Aires,  
16 (CP1425) Argentina

17 + Authors contributed equally to this work.

18

19 \*Corresponding author: María Victoria Periago, [vperiago@mundosano.org](mailto:vperiago@mundosano.org), Consejo Nacional de  
20 Investigaciones Científicas y Técnicas (CONICET), Fundación Mundo Sano, Paraguay 1535, Buenos Aires,  
21 (CP1061) Argentina.

22

23

24

25 **Abstract**

26 Soil-Transmitted Helminths (STH) are highly prevalent Neglected Tropical Disease in Ethiopia, an  
27 estimated 26 million are infected. Geographic Information Systems and Remote Sensing (RS) technologies  
28 assist data mapping and analysis, and the prediction of the spatial distribution of infection in relation to  
29 environmental variables. The influence of socioeconomic, environmental and soil characteristics on  
30 hookworm infection at the individual and household level is explored in order to identify spatial patterns  
31 of infection in rural villages from Zenzelema (Amhara region). Inhabitants greater than 5 years old were  
32 recruited in order to assess the presence of STH. Socioeconomic and hookworm infection variables at the  
33 household level and environmental variables and soil characteristics using RS were obtained. The  
34 dominant STH found was hookworm. Individuals which practiced open defecation and those without  
35 electricity had a significant higher number of hookworm eggs in their stool. Additionally, adults showed  
36 statistically higher hookworm egg counts than children. Nonetheless, the probability of hookworm  
37 infection was not determined by socioeconomic conditions but by environmental characteristics  
38 surrounding the households, including a combination of vigorous vegetation and bare soil, high  
39 temperatures, and compacted soils (high bulk density) with more acidic pH. The identification of high-risk  
40 environmental areas provides a useful tool for planning, targeting and monitoring of control measures,  
41 including not only children but also adults when hookworm is concerned.

42 **Author Summary**

43 Soil-Transmitted Helminths (STH) are a group of intestinal parasites that are included in the list of  
44 Neglected Tropical Diseases (NTDs) elaborated by the World Health Organization (WHO). This group  
45 includes roundworms, whipworms, and hookworms. Sub-Saharan Africa (SSA) is one of the most largely  
46 affected by NTDs and Ethiopia harbours one of the largest burdens of STH, especially hookworm, with 10  
47 million infected. In this study we aimed to explore the association between the environment, soil and  
48 socioeconomic characteristics most associated with the presence of hookworm infection in a rural area  
49 from Bahir Dar, Amhara Region, Ethiopia. Results of this study showed that the presence of hookworm  
50 around the household is associated to environmental characteristics such as high temperatures, a

51 combination of vigorous vegetation and bare compacted soil and acidic pH. On the other hand, the  
52 intensity of hookworm infection was associated to certain socioeconomic conditions such as the lack of  
53 latrines with the practice of open defecation and a lack of electricity. Therefore, in order for the infection  
54 to establish itself in a community, certain environmental characteristics are needed, but once the  
55 infection is established, certain socioeconomic characteristics play a role in its transmission pattern.

## 56 **Keywords**

57 Soil-transmitted helminths, hookworm, geographic information systems, remote sensing, environmental  
58 characteristics

## 59 **Introduction**

60 Neglected Tropical Diseases (NTDs) are widespread in Sub-Saharan African (SSA) countries with an  
61 estimated 500 million people being affected by the most common NTDs, including Soil-Transmitted  
62 Helminthiases, Schistosomiasis, Lymphatic Filariasis, Trachoma and Onchocerciasis (1). Ethiopia is not an  
63 exception and it is one of the countries with the highest burden of disease in SSA, with an estimated 80  
64 million people living in NTD endemic areas out of a population of 115 million (2); with the presence of  
65 almost all 20 diseases on the list, with very few exceptions (3). The Soil-Transmitted Helminths (STH) are  
66 the most prevalent in the country, with an estimated 10 million people infected with hookworm, 26  
67 million with *Ascaris lumbricoides* and 21 with *Trichuris trichiura* (1). Moreover, the presence of  
68 *Strongyloides stercoralis* has also been detected (4-7), but the actual burden is unknown since the  
69 techniques usually used for diagnosis of STH are not sensitive enough for this parasite (5).

70 In 2004, Ethiopia launched a deworming strategy focused on preschool aged children (PSAC) that was  
71 implemented in every district of the country, except the capital city of Addis Ababa (3). The program was  
72 organized by the Regional Health Bureaus (RHB) and by 2009; it had reached 11 million children (3). In  
73 2013, the Federal Democratic Republic of Ethiopia Ministry of Health (FMHO) launched its first NTD  
74 Master Plan and established a NTD Case Team within the Ministry (8). National guidelines for STH and



75 *Schistosoma* were put in place in 2014 (9) and in 2015 a national deworming program for school aged  
76 children (SAC) was launched (10), with a revision and update of the NTD Master Plan in 2016 (11). The  
77 number of people living in endemic areas for STH was approximately 79 million and the population living  
78 in areas that would qualify for mass drug administration (MDA) is comprised of 4.6 million PSAC, 17.7  
79 million SAC and 31.3 million adults (10, 11). A total of 476 **woredas** were identified through these  
80 different studies as in need of MDA for STH with prevalences ranging from 20% to greater than 50%, so  
81 that 279 woredas would require treatment twice per year according to World Health Organization (WHO)  
82 guidelines (10). The regional states most affected were Amhara, Gambela, Southern Nations, Nationalities  
83 and Peoples (SNNP) and the western part of Oromia.

84 Understanding the distribution of STH in specific areas as well as the factors most associated with their  
85 presence would allow tailoring programs to not only identify those areas most likely to be affected for  
86 allocation of resources but also to promote health practices to avoid reinfection after treatment.  
87 Geographic Information Systems (GIS) and Remote Sensing (RS) technologies assist not only data mapping  
88 and analysis but also the prediction of the spatial distribution of infection in relation to RS and  
89 environmental variables (12). Maps specific for STH have been developed in different countries in order  
90 to determine areas at risk for the presence of these parasites, most of them using historical prevalence  
91 data from either point studies (13-16) or national STH data (17), but none of these were conducted at the  
92 household level. Most studies conducted at the household level have determined certain risk factors for  
93 infection with STH, but environmental parameters were not included (18-21).

94 Previous studies conducted in Amhara have shown that hookworm is the predominant species of STH  
95 present in rural areas (4-6, 22-24). Given that Ethiopia is the country with third highest burden of  
96 hookworm in SSA, in the current study we explore the influence of socioeconomic, environmental and soil  
97 characteristics on the infection of hookworm at the individual and household level in order to identify  
98 spatial patterns of infection in a community from a rural *kebele* of Amhara region, Ethiopia. Highlighting

99 the identification of high-risk areas could provide a very useful tool for planning, targeting and monitoring  
100 of control measures.

## 101 **Methods**

102 **Study area.** Ethiopia is a Federal Democratic Republic comprised of ten regional states and two  
103 administrative cities which are then subdivided into 95 zones and 839 administrative *woredas* or districts.  
104 *Woredas* are further divided into 16,253 *kebeles*, the smallest administrative unit. Most of the country is  
105 suitable for the transmission of **these parasites**. The current study was conducted in the Amhara Region  
106 which is located in the north-western part of the country. The study was carried out in the rural *kebele* of  
107 Zenzelema, about 20 km east of Bahir Dar City, the capital of Amhara, in the South shore of Tana Lake  
108 (Fig. 1). The district is located in the highlands, at 1,700 to 2,000 m above sea level. The area is under the  
109 influence of three seasons: rainy, from June to September; spring, from October until January; and a dry  
110 season the rest of the year. This *kebele* is made of nine *gotts* or villages; five of them were randomly  
111 selected for the study (6).

112 Zenzelema, located in the main road, with poor access to water, Matoria and Sesaberet which are  
113 accessible by walking through earth tracks and have smaller streams and watercourses with natural  
114 water, and Kurbi and Gedro, located in more remote areas near Tana Lake, with no access tracks. In all  
115 these villages, except for Zenzelema, the houses are far apart from one another and surrounded by crops  
116 and wooded areas. On the other hand, Zenzelema is a congested settlement where houses are adjacent  
117 to one another (Fig. 2). The family subsistence economy is based on small cultivations and livestock  
118 (mainly cattle, sheep and goats). Even though the area is on the shore of Blue Nile and Tana Lake, water  
119 resources for cultivation are markedly dependent on the rain, with no existing infrastructure for  
120 rainwater collection. Moreover, land degradation because of erosion, mostly related to high  
121 deforestation rates, is a **big concern**, with high amounts of soil lost every year.

## 122 *Data collection*

123 The data of this study were collected in the frame of a larger research aimed at determining the  
124 prevalence of the STH *S. stercoralis* at the school and community level in an area known to be of high

125 prevalence for hookworm (5, 6). Briefly, all inhabitants over 5 years of age, living in the area for at least  
 126 three months, were invited to participate. Information about individual (children and adult) and  
 127 household characteristics was obtained by using WHO standardized surveys, adapted to the Ethiopian  
 128 culture and translated into Amharic language. All participants were asked to answer an individual  
 129 questionnaire while the head of the family was also asked to answer a household questionnaire. From  
 130 February to June 2016, a field team composed of a nurse, two HEW and the project coordinator went  
 131 house to house, to collect the samples, conduct the questionnaires and georeference the households.  
 132 Stool samples were processed as previously described (6) to determine presence and intensity of  
 133 hookworm infection.

134 **Household characterization.** Through the different questionnaires and sample collection, socioeconomic  
 135 and hookworm infection variables were obtained and analysed at the household level using a geographic  
 136 information system (QGIS software). Several socioeconomic variables were measured related to the  
 137 number of individuals per household, income, toilet type, water source, presence of electricity, etc. These  
 138 are further detailed in the result section. The parasitological parameters used for hookworm were the  
 139 number of hookworm infected individuals per household, and the mean number of EPG per household  
 140 (mean EPG of infected individuals per household).

141 **Soil and Environmental characterization.** The environmental variables selected for analysis were those  
 142 related to the variables reported as significant in previous studies that focused on the risk of soil-  
 143 transmitted helminth infections (13-17, 20, 38(25), 44-49(26-31)). The selected environmental variables  
 144 obtained through remote sensors were precipitation, temperature, NDVI, NDBI, MSI and BSI. These are  
 145 listed in Table 1, together with their source, characteristics and indexes used to calculate them.

146 **Table 1.** Environmental variables used with their characteristics, sources and indexes used to calculate  
 147 them.

| Environmental Variables | Source | Characteristics/<br>Indexes | Sentinel-2A |
|-------------------------|--------|-----------------------------|-------------|
|-------------------------|--------|-----------------------------|-------------|

|                                               |                                                                                         |                                                                                                                                           |
|-----------------------------------------------|-----------------------------------------------------------------------------------------|-------------------------------------------------------------------------------------------------------------------------------------------|
| Precipitation                                 | WorldClim version 2.1 climate data for 1979-2000 (New version released in January 2020) | Spatial resolution of 30 seconds (~1 km <sup>2</sup> )/ NA                                                                                |
| Temperature                                   | WorldClim version 2.1 climate data for 1979-2000 (New version released in January 2020) | Mean temperature from monthly January/ NA                                                                                                 |
| Normalized Difference Vegetation Index (NDVI) | Satellite imagery Sentinel-2A of 01 Feb 2017*<br><br>Level 1C product                   | Numerical indicator highly associated with vegetation content/ $(B8 - B4) / (B8 + B4)$                                                    |
| Normalized Difference Built-up Index (NDBI)   | Satellite imagery Sentinel-2A of 01 Feb 2017*<br><br>Level 1C product                   | Highlights urban areas/ $(B11 - B8) / (B11 + B8)$                                                                                         |
| Moisture Stress Index (MSI)                   | Satellite imagery Sentinel-2A of 01 Feb 2017*<br><br>Level 1C product                   | Index of hydric stress/ $(B11 / B08)$                                                                                                     |
| Bare Soil Index (BSI)                         | Satellite imagery Sentinel-2A of 01 Feb 2017*<br><br>Level 1C product                   | Numeric indicator that enhances the identification of bare soil areas and fallow lands/ $(B11 + B4) - (B8 + B2) / (B11 + B4) + (B8 + B2)$ |

148 \*Note: Source of ESA, image courtesy of the U.S. Geological Survey. Free Sentinel-2A imagery was downloaded from  
149 the ESA Sentinel data hub (<https://scihub.copernicus.eu>).

150 With respect to the interpretation of these indexes, high NDVI values correspond to areas that reflect  
151 more in the near-infrared spectrum, which indicates denser and healthier vegetation (50(32)). This index  
152 is related to MSI since it is a measure of hydric stress, with the highest numbers indicating greater hydric

153 stress of plants and therefore a lower content of soil humidity (51(33)). The values for MSI range from 0  
 154 to greater than 3, so the typical range of this index for vegetation is around 0.2 to 2 (52(34)). On the  
 155 other hand, NDBI highlights urban areas and is very helpful for estimating surfaces with buildings with  
 156 respect to bare areas or those with vegetation (53(35)). Finally, BSI is related to NDBI in the sense that it  
 157 is a numeric indicator that enhances the identification of bare soil areas and fallow lands (54(36)).

158 Soil variables with greater spatial resolution (250 m) were available for Ethiopia. Those variables related  
 159 to the ones previously used (13); organic carbon content, acidity, bulk density and gypsum content were  
 160 chosen and are listed in Table 2. BLDFIE is the ratio of the oven-dry mass of the solids to the volume of  
 161 the soil; the bulk volume includes not only the volume of the solids but also that of the pore space  
 162 (55(37)). With respect to the pH variables of the soil, they describe more than relative acidity or alkalinity,  
 163 it also provides information on nutrient availability, metal dissolution chemistry, and the activity of  
 164 microorganisms (56(38)), and therefore it might influence the presence or absence of hookworm larvae in  
 165 the soil. The remaining soil variables refer to the depth of the bedrock (BDRICM) in cm to a lithic or  
 166 paralithic contact and its composition, with the weight percentage of the clay particles (CLYPPT) as  $< 2 \mu\text{m}$   
 167 of the mass fraction of soil material at  $< 2 \text{ mm}$ , and the volumetric percentage of coarse fragments  
 168 (CRFVOL) as the mass fraction of the soil material at  $> 2 \text{ mm}$  (55(37)).

169 **Table 2.** Soil variables used with their abbreviation, characteristics and unit of measurement.

| Soil variables                    | Abbreviation | Characteristics (Unit)           |
|-----------------------------------|--------------|----------------------------------|
| Soil organic carbon content       | ORCDRC       | NA (permille)                    |
| Soil organic carbon stock         | Ocstha       | NA (ton/ha)                      |
| Bulk density                      | BLDFIE       | fine earth ( kg/m <sup>3</sup> ) |
| pH index measured in KCl solution | Phikcl       | Relative acidity or alkalinity   |
| pH index measured in water        | Phihox       | Relative acidity or alkalinity   |

|                                            |        |                                             |
|--------------------------------------------|--------|---------------------------------------------|
| solution                                   |        |                                             |
| Weight percentage of the silt particles    | SLTppt | Particles about 0.0002–0.05 mm (percentage) |
| Cation Exchange Capacity of soil           | CECSOL | NA (cmolc/kg)                               |
| Depth to bedrock                           | BDRICM | R horizon up to 200 cm (cm)                 |
| Weight percentage of the clay particles.   | CLYPPT | Particles about <0.0002 mm (percentage)     |
| Volumetric percentage of coarse fragments. | CRFVOL | Coarse fragments about >2 mm (percentage)   |

170 \*Note: NA: Not Applicable. Source: ISRIC — World Soil Information (37).

171 In order to determine any association with hookworm infection between any of these environmental and  
172 soil variables, given the route of infection of the parasite with a necessary passage through the soil, the  
173 average of each of these variables were estimated with a 30 m buffer radius around each household using  
174 QGIS software.

175 **Statistical Analysis.** SataScan was used to analyse the geographic spatial pattern of the parasitological  
176 indexes in the study area (57, 58(39, 40)). The presence of statistically significant spatial conglomerates  
177 was analysed, as well as that of the non-random distribution in space. This was performed by gradually  
178 scanning a window across space, noting the number of observed and expected observations inside the  
179 window at each location, and a p-value was assigned to the cluster. Scan statistics use a different  
180 probability model depending on the nature of the data. In this study, a Purely Spatial analysis was  
181 performed, with the objective of scanning for clusters with high values using the normal model for  
182 continuous data (58(40)). The unit of analysis was the household and the variables evaluated were mean  
183 EPG per household and number of individuals infected.

184 The association between individual EPG and characteristics of the household was analysed using the  
185 Mann-Whitney U (MWU) and Kruskal-Wallis H (KWH) tests. Chi square test was used for comparing the  
186 prevalence of the infection between villages. The individual social and economic characteristics evaluated  
187 are listed in the results section. Estimation of the household risk of hookworm infection was performed  
188 through a linear multiple regression analysis. The number of hookworm infected individuals per  
189 household as the dependent variable was modelled in relation to the predictive variables: environmental  
190 (Table 1), soil characteristics (Table 2) and socioeconomic variables (Supplementary Table 1). Statsmodel  
191 Python module (statsmodel.org) was used for the comparison between groups as well as to adjust the  
192 regression model.

### 193 **Ethics approval and consent to participate**

194 The Amhara National Regional State Health Bureau Ethics Review Committee revised and approved the  
195 study protocol (Ref. n<sup>o</sup>: 1/87/2008). According to the principles of the Helsinki Declaration, informed  
196 consent for stool examination was sought, as well as withdrawal, guarantee of anonymity, treatment and  
197 follow up. Written informed consent was set for adults and children; for the second group, parents or  
198 guardians signed the consent form.

### 199 **Results**

200 **Hookworm infection characteristics and spatial distribution.** A total of 792 individuals from 241  
201 households participated in the study by providing stool samples: 152 individuals from Mazoria, 193 from  
202 Sesaberet, 160 from Gedro, 139 from Kurbi and 148 from Zenzelema. The descriptive characteristics of  
203 hookworm infection in the five villages are detailed in Table 4. The mean number of people infected with  
204 hookworm was lower in Zenzelema (64.2%) and highest in Kurbi (87.8%), although the difference in  
205 prevalence and the mean eggs per gram of feces (EPG) per household between the villages was not  
206 statistically significant. In the larger previous study conducted in this study population (6), the presence of  
207 all **five species of STH** was detected, with a dominance of hookworm in Mazoria and Sesaberet, and a  
208 dominance of *S. stercoralis* in Zenzelema. With respect to hookworm, Kurbi not only had the highest

209 prevalence of infection (87.8%) but also the greatest average of infected individuals per household (3.0).  
 210 Nonetheless, the highest mean EPG per household was observed in Gedro (1442.7 EPG). With respect to  
 211 the intensity of hookworm infection, most infections were light and the only heavy intensity infection was  
 212 found in Gedro (Table 4).

213 **Table 4.** Infection status of the participants of the study from the five villages, Kurbi, Gedro, Mazoria,  
 214 Sesaberet and Zenzelema (Amhara State, Ethiopia).

| Hookworm infection characteristics                       | Mazoria<br>N = 152              | Sesaberet<br>N = 193             | Gedro<br>N = 160                           | Kurbi<br>N = 139                | Zenzelema<br>N = 148            |
|----------------------------------------------------------|---------------------------------|----------------------------------|--------------------------------------------|---------------------------------|---------------------------------|
| Prevalence [%]                                           | 79.6                            | 78.2                             | 83.8                                       | 87.8                            | 64.2                            |
| Number of infected individuals [No.]                     | 121                             | 151                              | 134                                        | 122                             | 95                              |
| No. of infected individuals by intensity as per MM [No.] | 121:<br>120 light<br>4 moderate | 150*:<br>144 light<br>6 moderate | 134:<br>129 light<br>4 moderate<br>1 heavy | 122:<br>113 light<br>9 moderate | 94*:<br>144 light<br>6 moderate |
| Mean number of infected individuals per household (mean) | 2.5                             | 2.7                              | 2.9                                        | 3.0                             | 2.3                             |
| Mean EPG per                                             | 1005.1                          | 1002.3                           | 1442.7                                     | 1273.4                          | 1224.5                          |



|                     |  |  |  |  |  |
|---------------------|--|--|--|--|--|
| household<br>(mean) |  |  |  |  |  |
|---------------------|--|--|--|--|--|

215 \*Note: MM: MacMaster Technique. EPG: Eggs per gram of feces. Intensity of infection for hookworm was  
216 measured according to WHO guidelines where: 1 to 1999 EPG is a light infection, 2000 to 3999 EPG is medium and  
217 >4000 EPG is heavy (59(41)). \*Lack of MM data for one sample from Sesaberet and one sample from Zenzelema.  
218 As far as the hookworm infection per household, the spatial distribution among the five villages is shown  
219 in Figure 3. In this figure, the data listed in Table 4 is verified. Most of the households presented at least  
220 three infected individuals (Fig. 3A) and the burden of infection was low, with more than 80% of the  
221 participants harbouring light hookworm infections and very few households with individuals harbouring  
222 moderate or high intensity infections (Fig. 3B). Kurbi, Gedro and Sesaberet had one household each with  
223 moderate mean EPG for the entire household. On the other hand, none of the villages contained  
224 households with high intensity mean EPG. Moreover, in Zenzelema, none of the households had more  
225 than five infected individuals and all of the average hookworm infections were of light intensity.  
226 According to the spatial cluster analysis, using the normal Statscan model, two clusters with high values  
227 for mean EPG were found in Gedro and Zenzelema while high value clusters for the number of infected  
228 individuals were found in Matoria, Gedro and Kurbi. The spatial localization of these clusters is observed  
229 in Figure 4. In Gedro, the cluster for the number of infected individuals partially coincided with the cluster  
230 with high values of mean EPG.  
231 The spatial distribution found was in agreement with what was observed in the terrain, with clear  
232 differences between the villages, as already described in the method section, but especially between  
233 Zenzelema and the rest of the villages. The habitat surrounding the houses was clearly different and more  
234 appropriate for the development of larvae in Matoria than in Zenzelema as can be observed in Figure 3.  
235 The area around the households in Matoria was more densely vegetated, with covered soil that tends to  
236 retain certain moisture and shade, versus the surroundings in Zenzelema where the houses are adjacent  
237 to each other and the area around the houses was more urbanized. In an area like Matoria or Gedro,

238 more fields for cultivation were observed serving as cover for the practice of open defecation than in a  
239 setting like Zenzelema.

240 **Household Socioeconomic characterization.** The database generated consisted of 138 households with  
241 complete socioeconomic characterization corresponding to the villages of Sesaberet, Mazoria and  
242 Zenzelema. The average number of inhabitants per household was four. These 138 households were all  
243 the same with respect to the roof, floor and wall characteristics. All the roofs were made of corrugated  
244 iron, all the floors were made of straw pasted with mud/cow dung and all the walls were made of wood  
245 and mud with straw. Supplementary Table 1 describes the socioeconomic variables collected for each  
246 household. A total of 212 households participated in the simple household questionnaire and a sub-group  
247 of 138 household participated in the extended questionnaire which included individual information on  
248 the head of the household. The relation between the level of EPG with respect to all the measured  
249 socioeconomic variables was explored. Figure 5 shows the graphical representation using box plots only  
250 of those variables which showed statistical significance with respect to the level of EPG observed  
251 ( $p < 0.05$ ).

252 As observed in Figure 5, those individuals which practiced open defecation had a significant higher  
253 number of hookworm eggs in their stool. This was also true for those that did not have electricity, and  
254 those that used water from treated boreholes for cooking and handwashing. Moreover, adults showed  
255 statistically significant higher hookworm egg counts than children. Adults that own their own land also  
256 had significant higher eggs counts.

257 **Spatial distribution of environmental and soil characteristics.** The spatial distribution of some of the  
258 analysed soil and environmental indexes evaluated in the regions comprising all five villages is shown in  
259 Figure 6. The different characteristics were quite uniform between the villages, including altitude,  
260 although the area between Kurbi and Gedro has higher vegetation and therefore the values for the  
261 normalized difference vegetation index (NDVI) were high, while the values for the moisture stress index  
262 (MSI), bare soil index (BSI) and normalized difference built-up index (NDBI) were low. This makes sense  
263 since NDVI and MSI are associated with vegetation content and hydric stress while BSI and NDBI are

264 associated with urban areas and bare soil or fallow lands. Taking a closer look by village, Gedro, Sesaberet  
265 and Kurbi had the highest average values for NDVI around the households (0.31, 0.27 and 0.27  
266 respectively), while the lower average values were found in Zenzelema (0.23) and Mazoria (0.23), while  
267 both Gedro and Zenzelema had higher average values of MSI around the households (1 and 0.93,  
268 respectively). Mazoria also had a high average value of BSI around the households (-0.017), while both  
269 Gedro and Zenzelema had low values (-0.35 and -0.33, respectively). The average NDBI index was higher  
270 in Zenzelema (-0.008) and Mazoria (-0.004) with respect to the rest of the villages (Gedro -0.035, Kurbi -  
271 0.023 and Sesaberet -0.022) and the average Dry bulk density index (BLDFIE) was highest in Sesaberet  
272 (1359.83) and lowest in Zenzelema (1320.18).

273 Taking the different parameters together, along with the infection characteristics, Kurbi had a high cluster  
274 of infected individuals in households that are located in an area with a high vegetation and hydric stress  
275 index. Mazoria also had a high cluster of infected individuals in households that were closer to an area  
276 with vegetation, higher hydric stress but also some bare soil. On the other hand, Gedro and Sesaberet  
277 had higher vegetation cover, higher bulk density and lower hydric stress and construction index, although  
278 Gedro had a high cluster of infected people while Sesaberet did not. Gedro also had a high cluster of  
279 households with high mean EPG and both of these clusters were located in households that were closer  
280 to an area with more bare soil. The households in Zenzelema presented surroundings with lower  
281 vegetation cover, lower proportion of bare soil and lower bulk density with higher hydric stress and  
282 construction index (BSI), and it also presented a high cluster of mean EPG per household. Sesaberet was  
283 the only village with no clusters of infection or high mean EPG and the households were surrounded by  
284 more vegetation and higher bulk density.

285 **Household risk of hookworm infection.** Only 89 households had complete socioeconomic data (all  
286 variables in the questionnaire were obtained). These households correspond to the villages of Sesaberet  
287 (SE), Mazoria (MA) and Zenzelema (ZE), thus including 368 individuals. This smaller database was used to  
288 model the risk of infection (number of individuals infected by hookworm per household – Ind\_Numb).  
289 The model obtained through the linear multiple regression analysis showed that only the following

290 variables significantly contributed to the model ( $p < 0.05$ ): BSI, MSI, Ind\_Numb, and Soil organic carbon  
291 concentration (ORCDRC) ( $R^2$ : 0.756, AIC: 229.4, the coefficients were 3.4041, -3.7972, 7.7182, and 1.1548  
292 respectively). Given only environmental characteristics and none of the socioeconomic characteristics  
293 from the extended questionnaire significantly contributed to the model, all the households with  
294 simplified questionnaires were included in order to broaden the database and explore the risk of  
295 infection in the entire study area. Accordingly, the model was run again with the 218 georeferenced  
296 households from the five villages which included 727 individuals. The linear multiple regression analysis  
297 ( $R^2$ : 0.767, AIC: 566.7) showed that only BSI (1.3208) and Ind\_Numb (0.7361) remained significant, while  
298 MSI and ORCDRC were no longer significant. The following variables also significantly contributed to the  
299 model ( $p < 0.05$ ): temperature (0.5163), pH index measured in water solution (PhiHox) (-0.8366), BLDFIE  
300 (0.0090) and NDVI (4.1564). BSI, Ind\_Numb, temperature, BLDFIE and NDVI showed a positive association  
301 with the risk of infection, while PhiHox showed a negative association.

302 In other words, if the land surrounding the household had denser and healthier surrounding vegetation,  
303 higher temperature, a greater surface of bare soil or fallow lands, and more compacted soils (higher bulk  
304 density), the probability of infection with hookworm increased. At the same time, the number of  
305 individuals present in a household was a determinant for the risk of hookworm infection, with the risk  
306 increasing as the number of individuals per household increased. On the contrary, the risk increased as  
307 the pH in the soil decreased, which means a more acidic than alkaloid pH would be favourable for the  
308 development of hookworm larvae in the soil.

309 Once the risk model for hookworm infected individuals per household was applied to the household  
310 taking into consideration the characteristics considered, the estimated number of infections per  
311 household was predicted and is presented in Figure 7A. There was a coincidence in the prediction with  
312 respect to the observed values (Fig. 7B). The few households that presented a different estimation than  
313 the one observed, overestimated the number of infected individuals and in no cases did it underestimate  
314 the risk of infection.

315 **Discussion**

316 The dominant STH found in all the villages was hookworm, except for Zenzelema where the dominant  
317 species was *S. stercoralis*, both of which are transmitted percutaneously. The other two STH species, *A.*  
318 *lumbricoides* and *T. trichiura*, which are transmitted by the faecal-oral route, were found at very low  
319 prevalences (6). The village with the highest prevalence of hookworm, Kurbi, also had the highest average  
320 number of individuals per household infected and the neighbouring village of Gedro was the only village  
321 with high intensity hookworm infection. In this study, the concept that around 20% of individuals harbour  
322 the higher intensity infections was confirmed (25(42)), since around 80% of the infections found were of  
323 light intensity.

324 Both Kurbi and Gedro were the villages with the higher number of households with infected individuals  
325 with respect to the other three villages. Both of these villages were located closer to Tana Lake and have  
326 no access roads, therefore they are more remote than the rest of the villages included in the study. An  
327 area in Gedro with higher values than expected was identified, for both the number of infected  
328 individuals and for the intensity of infection; this might be due to the accumulation of infections over  
329 time and might be related to the way the health system is set up in the area. Normally, health extension  
330 workers (HEW) from the health centre in Zenzelema are in charge of preventive health activities in the  
331 villages, house to house visits and also controls that take place in the health centre, mainly for women of  
332 reproductive age. The HEW are also in charge of MDA for PSAC but not for SAC since that program is  
333 implemented at the schools (8, 9). Therefore, access to the villages is important, with Zenzelema, Mazoria  
334 and Sesaberet having an easy access to the main road and to Bahir Dar City, while the situation of Kurbi  
335 and Gedro is challenging, especially in the rainy season, when lands are flooded and small rivers make  
336 access more difficult. In these scenarios, HEW are not able access these villages and the inhabitants  
337 themselves usually do not travel to the health centre in Zenzelema or to the hospital in Bahir Dar unless  
338 they are very sick. In this area, MDA with albendazole is scheduled every 6 months, in May and November  
339 (11). However, data on the coverage of the program is poor and punctual situations alter the schedule  
340 frequently (i.e. due to the SARS-CoV-2 pandemic, MDA was implemented in December 2020 in a house by  
341 house manner).

342 Gedro and Sesaberet were the villages with the greatest vegetation cover, soil bulk density and less  
343 hydric stress and construction index. On the contrary, Zenzelema had fewer infected individuals per  
344 household and lower intensity infections. The houses in this village presented lower vegetation cover,  
345 lower proportion of bare soil and lower soil bulk density, although they presented higher hydric stress  
346 and construction index. This is in agreement with what was observed in the field since Zenzelema is  
347 located near the main road that connects this area with the North of the country and it is the most urban  
348 of all the five villages included, with the houses adjacent to each other and with less vegetation cover.

349 Individuals which practiced open defecation and those that owned their land for farming had a significant  
350 higher number of hookworm eggs in their stool; this relationship between hookworm infection and  
351 farming has been previously described (26-29(43-46)). Additionally, in the current study, those individuals  
352 that did not have electricity as well as those that used water from treated boreholes for cooking and  
353 handwashing also had a significant number of hookworm eggs in there stool. Unsafe water has also been  
354 previously associated with STH infection (18, 19, 30(47)). As part of the prevention activities performed  
355 by HEW in the different villages included in this study, are those related to the promotion of treatment of  
356 boreholes with chlorine. The finding that treated boreholes are associated with greater hookworm  
357 infection should be noted in order to revise the treatment of boreholes with respect to correct dosing of  
358 chlorine, safe storage/handling of water at the household level and the existence of a fence or cover to  
359 protect the borehole and avoid recontamination. The placement of the latrine and borehole should also  
360 be taken into consideration to avoid contamination of the water with faecal material.

361 The relationship between STH and a lack of sanitation and hygiene has been previously reported in  
362 Ethiopia with both positive (19, 23, 26(43), 30-32(47-49)) and negative associations (33(50)). Moreover,  
363 the relationship between a lack of electricity and the presence of intestinal parasite infection has also  
364 been found in other studies (20, 34(51)). In this study adults showed statistically higher hookworm egg  
365 counts than children; this confirms that for hookworm, adults tend to have higher intensities of infection  
366 contrary to what is observed for *A. lumbricoides* and *T. trichiura* (35(52)). Moreover, adults are not usually  
367 targeted for STH MDA so they may accumulate the infection over time and continue contaminating the

368 environment. Although the intensity of infection was influenced by the sanitary conditions of the  
369 household, the probability of infection with hookworm did not seem to be determined by socioeconomic  
370 conditions (22), except for the number of individuals per household, since infection tends to be more  
371 prevalent when there's overcrowding (18, 21, 36(53), 37(54)).

372 Nonetheless, infection does seem to be related to the environmental conditions around the household.  
373 The infection was more probable in households surrounded by a combination of vigorous vegetation and  
374 bare soil, high temperatures and compacted soils (high bulk density) with more acidic pH (15, 17, 38-  
375 40(25, 55-56)). This coincides with the findings of this study, since Gedro was the village that presented  
376 the highest number of infected individuals and higher intensity infections and was located in an area with  
377 greater spatial vegetation cover, compacted soil and lower hydric stress and construction index. This has  
378 already been observed in other studies with respect to the precipitation, temperature and vegetation  
379 cover (13, 41(57), 42(58)) but also with respect to the pH since hookworms can tolerate a pH range of 4.6  
380 to 9.4 were they are still able to hatch and infect (43(59)). The presence of vigorous vegetation also  
381 favours the act of open defecation since it gives the individual privacy.

382 A coincidence in the prediction is observed, with a lack of an underestimation of the risk, even though a  
383 few households manifest an overestimation of the number of individuals infected. Although the value of  
384 precision of the model is acceptable, it would be interesting to analyse how the incorporation of the  
385 predictive variables of different factors and different spatial resolutions modify the performance of the  
386 prediction. The model generated would allow predicting the numbers of infected individuals per  
387 household in the study area as more predictive variables are added and updated. The estimated variables  
388 obtained from satellites are easily updatable in a frequent manner, while the variables obtained in the  
389 field (i.e. number of infected individuals per household) are relatively static. Therefore, a probability  
390 infection map that is frequently updated may be obtained so as to guide the health authorities in order to  
391 be able to plan actions for the prevention and control of hookworm and other soil-transmitted helminths.  
392 Certain limitations of the study might have influenced the results, since not all nine villages from the area  
393 were included in the study and not all houses participated in the extended household questionnaire.

394 The use of environmental variables with high resolution, with a 30 meter radius around the household,  
395 together with the infection and intensity data evidenced that for the establishment of hookworm  
396 infection a suitable environment is necessary. Moreover, socioeconomic and behavioural parameters  
397 (such as source of water or practice of open defecation) seem to influence the intensity of the infection  
398 once it has already been established.

### 399 **Acknowledgments**

400 We would like to thank the Amhara National Regional State Health Bureau in Bahar Dar for its  
401 collaboration and support in this study. We appreciate the support of the Zenzelema Health Center  
402 director Mr. Tadesse Meseret Kokeb and all the staff for their collaboration. We are most grateful to the  
403 community leaders for facilitating the participation and contact with the community. We would also like  
404 to thank Marcelo Abril and Marcelo Scavuzzo for their institutional support, directors of Fundación  
405 Mundo Sano and Instituto Gulich, respectively.

### 406 **Consent for publication**

407 Not applicable.

### 408 **Availability of data and materials**

409 All data generated or analysed during this study are included in this published article [and its  
410 supplementary information files].

### 411 **Competing interests**

412 The authors declare that they have no competing interests.

### 413 **Funding**

414 This study was funded by Fundación Mundo Sano and Instituto de Salud Carlos III. The funders had no  
415 roles in the design of the study or collection, analysis and interpretation of the data. CMS has a PhD  
416 scholarship from Consejo Nacional de Investigaciones Científicas y Técnicas (CONICET).

### 417 **Author's contributions**



418 M.A., A.A.A., Z.H., A.B. and M.V.P. designed the research, M.A. and A.A.A. organized and performed all  
419 the field research, S.L. collected all the remote sensing data and images and elaborated the figures, S.L.,  
420 C.M.S. and M.V.P. analysed data and performed the statistical analysis, and M.A., S.L. and M.V.P. wrote  
421 the paper while A.A.A., Z.H. and M.V.P. edited it. All authors read and approved the final manuscript.

#### 422 **Competing interests**

423 The authors declare no competing interests.

#### 424 **Data availability**

425 All data generated or analysed during this study are included in this published article.

#### 426 **References**

- 427 1. Hotez PJ, Kamath A. Neglected tropical diseases in Sub-Saharan Africa: review of their prevalence,  
428 distribution, and disease burden. *PLoS Negl Trop Dis.* 2009;3(8): e412.  
429 doi:10.1371/journal.pntd.0000412.
- 430 2. Mengitsu B, Shafi O, Kebede B, Kebede F, Worku DT, Herero M, et al. et al. Ethiopia and its steps  
431 to mobilize resources to achieve 2020 elimination and control goals for neglected tropical  
432 diseases: Spider webs joined can tie a lion. *Int Health.* 2016;8(Suppl 1): i34–i52.  
433 doi:10.1093/inthealth/ihw007.
- 434 3. Deribe K, Meribo K, Gebre T, Hailu A, Ali A, Aseffa A, et al. The burden of neglected tropical  
435 diseases in Ethiopia, and opportunities for integrated control and elimination. *Parasit Vectors.*  
436 2012;5: 240. doi:10.1186/1756-3305-5-240.
- 437 4. Abera B, Alem G, Yimer M, Herrador Z. Epidemiology of soil-transmitted helminths, *Schistosoma*  
438 *mansoni*, and haematocrit values among schoolchildren in Ethiopia. *J Infect Dev Ctries.* 2013;7(3):  
439 253-260. doi:10.3855/jidc.2539.
- 440 5. Amor A, Rodriguez E, Saugar JM, Arroyo A, López-Quintana B, Abera B, et al. High prevalence of  
441 *Strongyloides stercoralis* in school-aged children in a rural highland of north-western Ethiopia: the

- 442 role of intensive diagnostic work-up. *Parasit Vectors*. 2016;9: 617. doi:10.1186/s13071-016-1912-  
443 8.
- 444 6. Aramendia AA, Anegagrie M, Zewdie D, Dacal E, Saugar JM, Herrador Z, et al. Epidemiology of  
445 intestinal helminthiasis in a rural community of Ethiopia: Is it time to expand control programs to  
446 include *Strongyloides stercoralis* and the entire community? *PLoS Negl Trop Dis*. 2020;14(6):  
447 e0008315. doi:10.1371/journal.pntd.0008315.
- 448 7. Terefe Y., Ross K., Whiley H. Strongyloidiasis in Ethiopia: systematic review on risk factors,  
449 diagnosis, prevalence and clinical outcomes. *Infect Dis Poverty*. 2019;8(1): 53.  
450 doi:10.1186/s40249-019-0555-3.
- 451 8. FMOH (Federal Democratic Republic of Ethiopia Ministry of Health). Ethiopia national master plan  
452 for neglected tropical diseases (2013–2015). Addis Ababa, Ethiopia. (Federal Democratic Republic  
453 of Ethiopia Ministry of Health, 2013).  
454 [http://www.ntdenvision.org/sites/default/files/docs/national\\_ntd\\_master\\_plan\\_ethiopia\\_2013-](http://www.ntdenvision.org/sites/default/files/docs/national_ntd_master_plan_ethiopia_2013-2015_1.pdf)  
455 [2015\\_1](http://www.ntdenvision.org/sites/default/files/docs/national_ntd_master_plan_ethiopia_2013-2015_1.pdf).pdf. Accessed 30 June 2020.
- 456 9. Federal Democratic Republic of Ethiopia Ministry of Health, Schistosomiasis and soil-transmitted  
457 helminths national action plan. Addis Ababa, Ethiopia (Federal Democratic Republic of Ethiopia  
458 Ministry of Health, 2014).
- 459 10. Negussu N, Mengistu B, Kebede B, Deribe K, Ejigu E, Tadesse G, et al. Ethiopia schistosomiasis and  
460 soil-transmitted helminthes control programme: progress and prospects. *Ethiop Med J*.  
461 2017;55(Suppl 1): 75–80.
- 462 11. Federal Democratic Republic of Ethiopia Ministry of Health, Ethiopia national master plan for  
463 neglected tropical diseases (2016-2020). Second Edition. (Federal Democratic Republic of Ethiopia  
464 Ministry of Health, Addis Ababa, Ethiopia, 2016).

- 465 12. Brooker S., Michael E. The potential of geographical information systems and remote sensing in  
466 the epidemiology and control of human helminth infections. *Adv Parasitol.* 2004;47: 245-288.  
467 doi:10.1016/s0065-308x(00)47011-9.
- 468 13. Alvarez Di Fino E, Rubio J, Abril M, Porcasi X., Periago MV. Risk map development for soil-  
469 transmitted helminth infections in Argentina. *PLOS Negl Tropical Dis.* 2020;14(2): e0008000.  
470 doi:10.1371/journal.pntd.0008000.
- 471 14. Chammartin F, Scholte RG, Malone JB, Bavia ME, Nieto P, Utzinger J, et al. Modelling the  
472 geographical distribution of soil-transmitted helminth infections in Bolivia. *Parasit Vectors.*  
473 2013;6: 152. doi:10.1186/1756-3305-6-152.
- 474 15. Chaiyos J, Suwannatrai K, Thinkhamrop K, Pratumchart K, Sereewong C, Tesana S, et al. MaxEnt  
475 modeling of soil-transmitted helminth infection distributions in Thailand. *Parasitol Res.*  
476 2018;117(11): 3507–3517. doi:10.1007/s00436-018-6048-7.
- 477 16. Lai YS, Zhou XN, Utzinger J., Vounatsou P. Bayesian geostatistical modelling of soil-transmitted  
478 helminth survey data in the People’s Republic of China. *Parasit Vectors.* 2013;6: 359.  
479 doi:10.1186/1756-3305-6-359.
- 480 17. Oluwole AS, Ekpo UF, Karagiannis-Voules DA, Abe EM, Olamiju FO, Isiyaku S, et al. Bayesian  
481 geostatistical model-based estimates of soil-transmitted helminth infection in Nigeria, including  
482 annual deworming requirements. *PLoS Negl Trop Dis.* 2015;9(4): e0003740.  
483 doi:10.1371/journal.pntd.0003740.
- 484 18. Chin YT, Lim YA, Chong CW, Teh CS, Yap IK, Lee SC, et al. Prevalence and risk factors of intestinal  
485 parasitism among two indigenous sub-ethnic groups in Peninsular Malaysia. *Infect Dis Poverty.*  
486 2016;5: 77. doi: 10.1186/s40249-016-0168-z.
- 487 19. Molla E, Mamo, H. Soil-transmitted helminth infections, anemia and undernutrition among school  
488 children in Yirgacheffee, South Ethiopia. *BMC Res Notes.* 2018;11: 585. doi:10.1186/s13104-018-  
489 3679-9.

- 490 20. Periago MV, García R, Astudillo O, Cabrera M, Abril M. Prevalence of intestinal parasites and the  
491 absence of soil-transmitted helminths in Añatuya, Santiago del Estero, Argentina. *Parasit Vectors*.  
492 2018;11(1): 638. doi:10.1186/s13071-018-3232-7.
- 493 21. Romero-Sandoval N, Ortiz-Rico C, Sánchez-Pérez HJ, Valdivieso D, Sandoval C, Pástor J, et al. Soil  
494 transmitted helminthiasis in indigenous groups. A community cross sectional study in the  
495 Amazonian southern border region of Ecuador. *BMJ Open*. 2017;7(3): e013626.  
496 doi:10.1136/bmjopen-2016-013626.
- 497 22. Abdia M, Nibretb E, Munshea A. Prevalence of intestinal helminthic infections and malnutrition  
498 among schoolchildren of the Zegie Peninsula, northwestern Ethiopia. *J Infect Public Health*.  
499 2017;10: 84-92. doi:10.1016/j.jiph.2016.02.009.
- 500 23. Muluneh C, Hailu T, Alemu G. Prevalence and associated factors of soil-transmitted helminth  
501 infection among children living with and without open defecation practices in Northwest  
502 Ethiopia: A comparative cross-sectional study. *Am. J. Trop. Med and Hyg*. 2020;103(1): 266-272.  
503 doi:10.4269/ajtmh.19-0704.
- 504 24. Nute AW, Endeshaw T, Stewart AEP, Sata E, Bayissasse B, Zerihun M, et al. Prevalence of soil-  
505 transmitted helminths and *Schistosoma mansoni* among a population-based sample of school-age  
506 children in Amhara region, Ethiopia. *Parasit Vectors*. 2018;11(1): 431. doi:10.1186/s13071-018-  
507 3008-0.
- 508 25. Knopp S, Mohammed KA, Simba Khamis I, Mgeni AF, Stothard JR, Rollinson D, et al. Spatial  
509 distribution of soil transmitted helminths, including *Strongyloides stercoralis*, among children in  
510 Zanzibar. *Geospat Health*. 2008;3(1): 47–56. doi:10.4081/gh.2008.231.
- 511 26. Chammartin F, Scholte RG, Guimaraes LH, Tanner M, Utzinger J, Vounatsou P. Soil-transmitted  
512 helminth infection in South America: a systematic review and geostatistical meta-analysis. *Lancet*  
513 *Infect Dis*. 2013;13(6): 507–518. doi:10.1016/S1473-3099(13)70071-9.

- 514 27. Chammartin F, Guimaraes LH, Scholte RG, Bavia ME, Utzinger J, Vounatsou P. Spatio-temporal  
515 distribution of soil-transmitted helminth infections in Brazil. *Parasit Vectors*. 2014;7: 440. doi:  
516 10.1186/1756-3305-7-440.
- 517 28. Khieu V, Schar F, Forrer A, Hattendorf J, Marti H, Duong S, et al. High prevalence and spatial  
518 distribution of *Strongyloides stercoralis* in rural Cambodia. *PLoS Negl Trop Dis*. 2014; 24921627.  
519 doi:10.1371/journal.pntd.0002854.
- 520 29. Owada K, Lau CL, Leonardo L, Clements ACA, Yakob L, Nielsen M, et al. Spatial distribution and  
521 populations at risk of *A. lumbricoides* and *T. trichiura* co-infections and infection intensity classes:  
522 an ecological study. *Parasit Vectors*. 2018;11(1): 535. doi:10.1186/s13071-018-3107-y.
- 523 30. Pullan RL, Bethony JM, Geiger SM, Cundill B, Correa-Oliveira R, Quinnell RJ, et al. Human helminth  
524 co-infection: analysis of spatial patterns and risk factors in a Brazilian community. *PLoS Negl Trop*  
525 *Dis*. 2008;2(12): e352. doi:10.1371/journal.pntd.0000352.
- 526 31. Soares Magalhaes RJ, Langa A, Pedro JM, Sousa-Figueiredo JC, Clements AC, Vaz Nery S. Role of  
527 malnutrition and parasite infections in the spatial variation in children's anaemia risk in northern  
528 Angola. *Geospat Health*. 2013;7(2): 341–354. doi:10.4081/gh.2013.91.
- 529 32. Rouse JW, Haas RH, Schell JA, Deering DW. *Monitoring vegetation systems in the Great Plains*  
530 *with ERTS*. In: NASA Goddard Space Flight Center 3d ERTS-1.  
531 <https://ntrs.nasa.gov/search.jsp?R=19740022614> 2020-07-27T22:27:18+00:00Z (1974).
- 532 33. Hunt Jr. ER, Rock BN. Detection of changes in leaf water content using near-and middle-infrared  
533 reflectances. *Remote Sens Environ*. 1989;30(1): 43-54. doi:10.1016/0034-4257(89)90046-1.
- 534 34. Welikhe P, Quansah JE, Fall S., McElhenney W. Estimation of soil moisture percentage using  
535 Landsat-based moisture stress index. *J Remote Sens & GIS*. 2017;6(2): 1000200.  
536 doi:10.4172/2469-4134.1000200.

- 537 35. Zha Y, Gao J., Ni S. Use of normalized difference built-up index in automatically mapping urban  
538 areas from TM imagery. *Int J Remote Sens.* 2013;24(3): 583-594. doi:10.1080/01431160304987.
- 539 36. Rikimaru A, Roy PS, Miyatake S. Tropical forest cover density mapping. *Trop Ecol.* 2002;43(1): 39-  
540 47.
- 541 37. ISRIC World Soil Information (2020). [https://www.isric.org/projects/africa-soil-information-](https://www.isric.org/projects/africa-soil-information-service-afsis)  
542 [service-afsis](https://www.isric.org/projects/africa-soil-information-service-afsis). Accessed 25 April 25 2020.
- 543 38. Miller RO, Kissel DE. Comparison of soil pH methods on soils of North America. *Soil Sci Soc Am J.*  
544 2010;74(1): 310-316.
- 545 39. Kulldorff, M. Information management services SaTScan: software for the spatial and space–time  
546 scan statistics, version 4.0 [computer program]. (2003). Available: <http://www.satscan.org/>.  
547 Accessed 30 June 2020.
- 548 40. Kulldorff M, Huang L, Konty K. A scan statistic for continuous data based on the normal  
549 probability model. *Int J Health Geogr.* 2009; doi:10.1186/1476-072X-8-58.
- 550 41. Montresor A, Crompton DWT, Hall A, Bundy DAP, Savioli L. Guidelines for the evaluation of soil-  
551 transmitted helminthiasis and schistosomiasis at community level: a guide for managers of  
552 control programmes. World Health Organization (1998).  
553 <https://apps.who.int/iris/handle/10665/63821>.
- 554 42. Bundy DAP. Population ecology of intestinal helminth infections in human communities. *Philos*  
555 *Trans R Soc Lond B Biol Sci.* 1998;321(1207): 405-420. doi:10.1098/rstb.1988.0100.
- 556 43. Kaliappan SP, George S, Francis MR, Kattula D, Sarkar R, Minz S, et al. Prevalence and clustering of  
557 soil-transmitted helminth infections in a tribal area in southern India. *Trop Med Int Health.* 2013;  
558 18(12): 1452–1462. doi:10.1111/tmi.12205.
- 559 44. Loukouri A, Méité A, Kouadio OK, Djè NN, Trayé-Bi G, Koudou BG, et al. Prevalence, intensity of  
560 soil-transmitted helminths, and factors associated with infection: importance in control program

- 561 with ivermectin and albendazole in Eastern Côte d'Ivoire. J Trop Med. 2019; 7658594.  
562 doi:10.1155/2019/7658594.
- 563 45. Matthys B, Tschannen AB, Tian-Bi NT, Comoe H, Diabate S, Traore M, et al. Risk factors for  
564 *Schistosoma mansoni* and hookworm in urban farming communities in western Cote d'Ivoire.  
565 Trop Med Int Health. 2007;12(6): 709-723. doi:10.1111/j.1365-3156.2007.01841.x.
- 566 46. Shah HA, Huxley P, Elmes J, Murray KA. Agricultural land-uses consistently exacerbate infectious  
567 disease risks in Southeast Asia. Nat Commun. 2019;10(1): 4299. doi:10.1038/s41467-019-12333-z.
- 568 47. Tekalign E, Bajiro M, Ayana M, Tiruneh A, Belay T. Prevalence and intensity of soil-transmitted  
569 helminth infection among rural community of Southwest Ethiopia: a community-based study.  
570 Biomed Res Int. 2019;3687873. doi:10.1155/2019/3687873.
- 571 48. Anunobi JT, Okoye IC, Aguzie IO, Ndukwe YE, Okpasuo OJ. Risk of soil-transmitted helminthiasis  
572 among agrarian communities of Kogi State, Nigeria. Ann Glob Health. 2019;85(1): 120.  
573 doi:10.5334/aogh.2563.
- 574 49. Grimes JET, Tadesse G, Mekete K, Wuletaw Y, Gebretsadik A, French MD, et al. School water,  
575 sanitation, and hygiene, soil-transmitted helminths, and schistosomes: national mapping in  
576 Ethiopia. PLoS Negl Trop Dis. 2016;10(3): e0004515. doi:10.1371/journal.pntd.0004515.
- 577 50. Oswald WE, Stewart AEP, Kramer MR, Endeshaw T, Zerihun M, Melak B, et al. Association of  
578 community sanitation usage with soil-transmitted helminth infections among school-aged  
579 children in Amhara Region, Ethiopia. Parasit Vectors. 2017;10: 91. doi:10.1186/s13071-017-2020-  
580 0.
- 581 51. Morales-Espinoza EM, Sánchez-Pérez HJ, García-Gil MM, Vargas-Morales G, Méndez-Sánchez JD,  
582 Pérez-Ramírez M. Intestinal parasites in children, in highly deprived areas in the border region of  
583 Chiapas, Mexico. Salud Publica Mex. 2003;45(5): 379-388. doi:10.1590/s0036-  
584 36342003000500008.

- 585 52. Truscott JE, Hollingsworth TD, Brooker SJ, Anderson RM. Can chemotherapy alone eliminate the  
586 transmission of soil transmitted helminths? *Parasit Vectors*. 2014;7(1): 266. doi:10.1186/1756-  
587 3305-7-266.
- 588 53. Milano AM, Oscherov EB, Palladino AC, Bar AR. Children enteroparasitosis in north east Argentine  
589 urban area. *Medicina (B Aires)*. 2007;67: 238–42 (in Spanish).
- 590 54. Parija SC, Chidambaram M, Mandal J. Epidemiology and clinical features of soil-transmitted  
591 helminths. *Trop Parasitol*. 2017;7(2): 81-85. doi:10.4103/tp.TP\_27\_17.
- 592 55. Mudenda NB, Malone JB, Kearney MT, Mischler PD, Nieto PM, McCarroll JC, et al. Modelling the  
593 ecological niche of hookworm in Brazil based on climate. *Geospat Health*. 2012;6(3): S111-S123.
- 594 56. Scholte RGC, Schur N, Bavia ME, Carvalho EM, Chammartin F, Utzinger J, et al. Spatial analysis and  
595 risk mapping of soil-transmitted helminth infection in Brazil, using Bayesian geostatistical models.  
596 *Geospat Health*. 2013;8(1): 97-110. doi:10.4081/gh.2013.58.
- 597 57. Ovutor O, Imafidor H, Awi-waadu GDW. Assessment of physico-chemical parameters of soils in  
598 fallowing farmlands and pit toilet environments as it affects the abundance of geohelminthes in  
599 Emohua Local Government Area, Rivers State, Nigeria. *Annu Res Rev*. 2017;14(3): 1-10.  
600 doi:10.9734/ARRB/2017/31546.
- 601 58. Sedionoto B, Wasessombat S, Punsawad C, Anamnart W. Environmental factors and prevalence  
602 of hookworm infection and strongyloidiasis in Rural East Kalimantan, Indonesia. *E3S Web of  
603 Conferences*. 2019;125: 04001. doi:10.1051/e3sconf/201912504001.
- 604 59. World Health Organization. Integrated guide to sanitary parasitology. WHO Regional Office for  
605 the Eastern Mediterranean (2004).

606 **Figure 1.** Study area in Amhara Region, Ethiopia. The villages included in this study were Kurbi, Gedro,  
607 Matoria, Sesaberet and Zenzelema, belonging to a rural district. The number of people (n) recruited per  
608 village as well as their age range in years (Y), average age (X) and distribution by sex (F = % female) are



609 noted in the box on the right hand corner. Map data © 2020 Openstreetmap, base map obtained through  
610 QuickMap Services QGIS plugin - QGIS Geographic Information System. Open Source Geospatial  
611 Foundation Project. <http://qgis.osgeo.org>.

612 **Figure 2.** An example of the villages included in the study with Mazoria (A) as an example of a more rural  
613 and isolated village and Zenzelema (B) as an example of a more urbanized village in the main road.

614 **Figure 3.** Spatial distribution of hookworm infection. A. Number of infected individuals per household. B.  
615 Mean EPG in each of the households for the five villages. GE: Gedro, KU: Kurbi, MA: Mazoria, SE:  
616 Sesaberet, ZE: Zenzelema. Map data © 2020 Google, base map obtained through QuickMap Services QGIS  
617 plugin - QGIS Geographic Information System. Open Source Geospatial Foundation Project.  
618 <http://qgis.osgeo.org>.

619 **Figure 4.** Spatial clusters of households with high value of mean EPG per household and number of  
620 infected individuals. The color of each household point refers to the mean EPG value. GE: Gedro, KU:  
621 Kurbi, MA: Mazoria, SE: Sesaberet, ZE: Zenzelema. Map data © 2020 Google, base map obtained through  
622 QuickMap Services QGIS plugin - QGIS Geographic Information System. Open Source Geospatial  
623 Foundation Project. <http://qgis.osgeo.org>.

624 **Figure 5.** Boxplots showing the association between the number of eggs per gram of feces (EPG) and  
625 characteristics of the households. A. Toilet Type. B. Presence/absence of electricity. C. Water source for  
626 cooking. D. Water source for handwashing. E. Age (Child refers to all those under 14 and Adult refers to  
627 all those 15 or older). F. Land property. MWU: Mann-Whitney U, KWH: Kruskal-Wallis H, p: significance  
628 test ( $p < 0.05$ ).

629 **Figure 6.** Spatial distribution of the different soil and environmental indexes analyzed. NDVI: Normalized  
630 Difference Vegetation Index. MSI: Moisture Stress Index. BSI: Bare Soil Index. NDBI: Normalized  
631 Difference Built-up Index. BLDIE: Soil Bulk density. Map data © 2020 Google, base map obtained through

632 QuickMap Services QGIS plugin - QGIS Geographic Information System. Open Source Geospatial  
633 Foundation Project. <http://qgis.osgeo.org>.

634 **Figure 7.** Map of the number of the hookworm infected individuals predicted (A) and observed (B) per  
635 household in the five villages. GE: Gedro, KU: Kurbi, MA: Matoria, SE: Sesaberet, ZE: Zenzelema. Map data  
636 © 2020 Google, base map obtained through QuickMap Services QGIS plugin - QGIS Geographic  
637 Information System. Open Source Geospatial Foundation Project. <http://qgis.osgeo.org>.

638

639

640

641

642

643

Figure 1

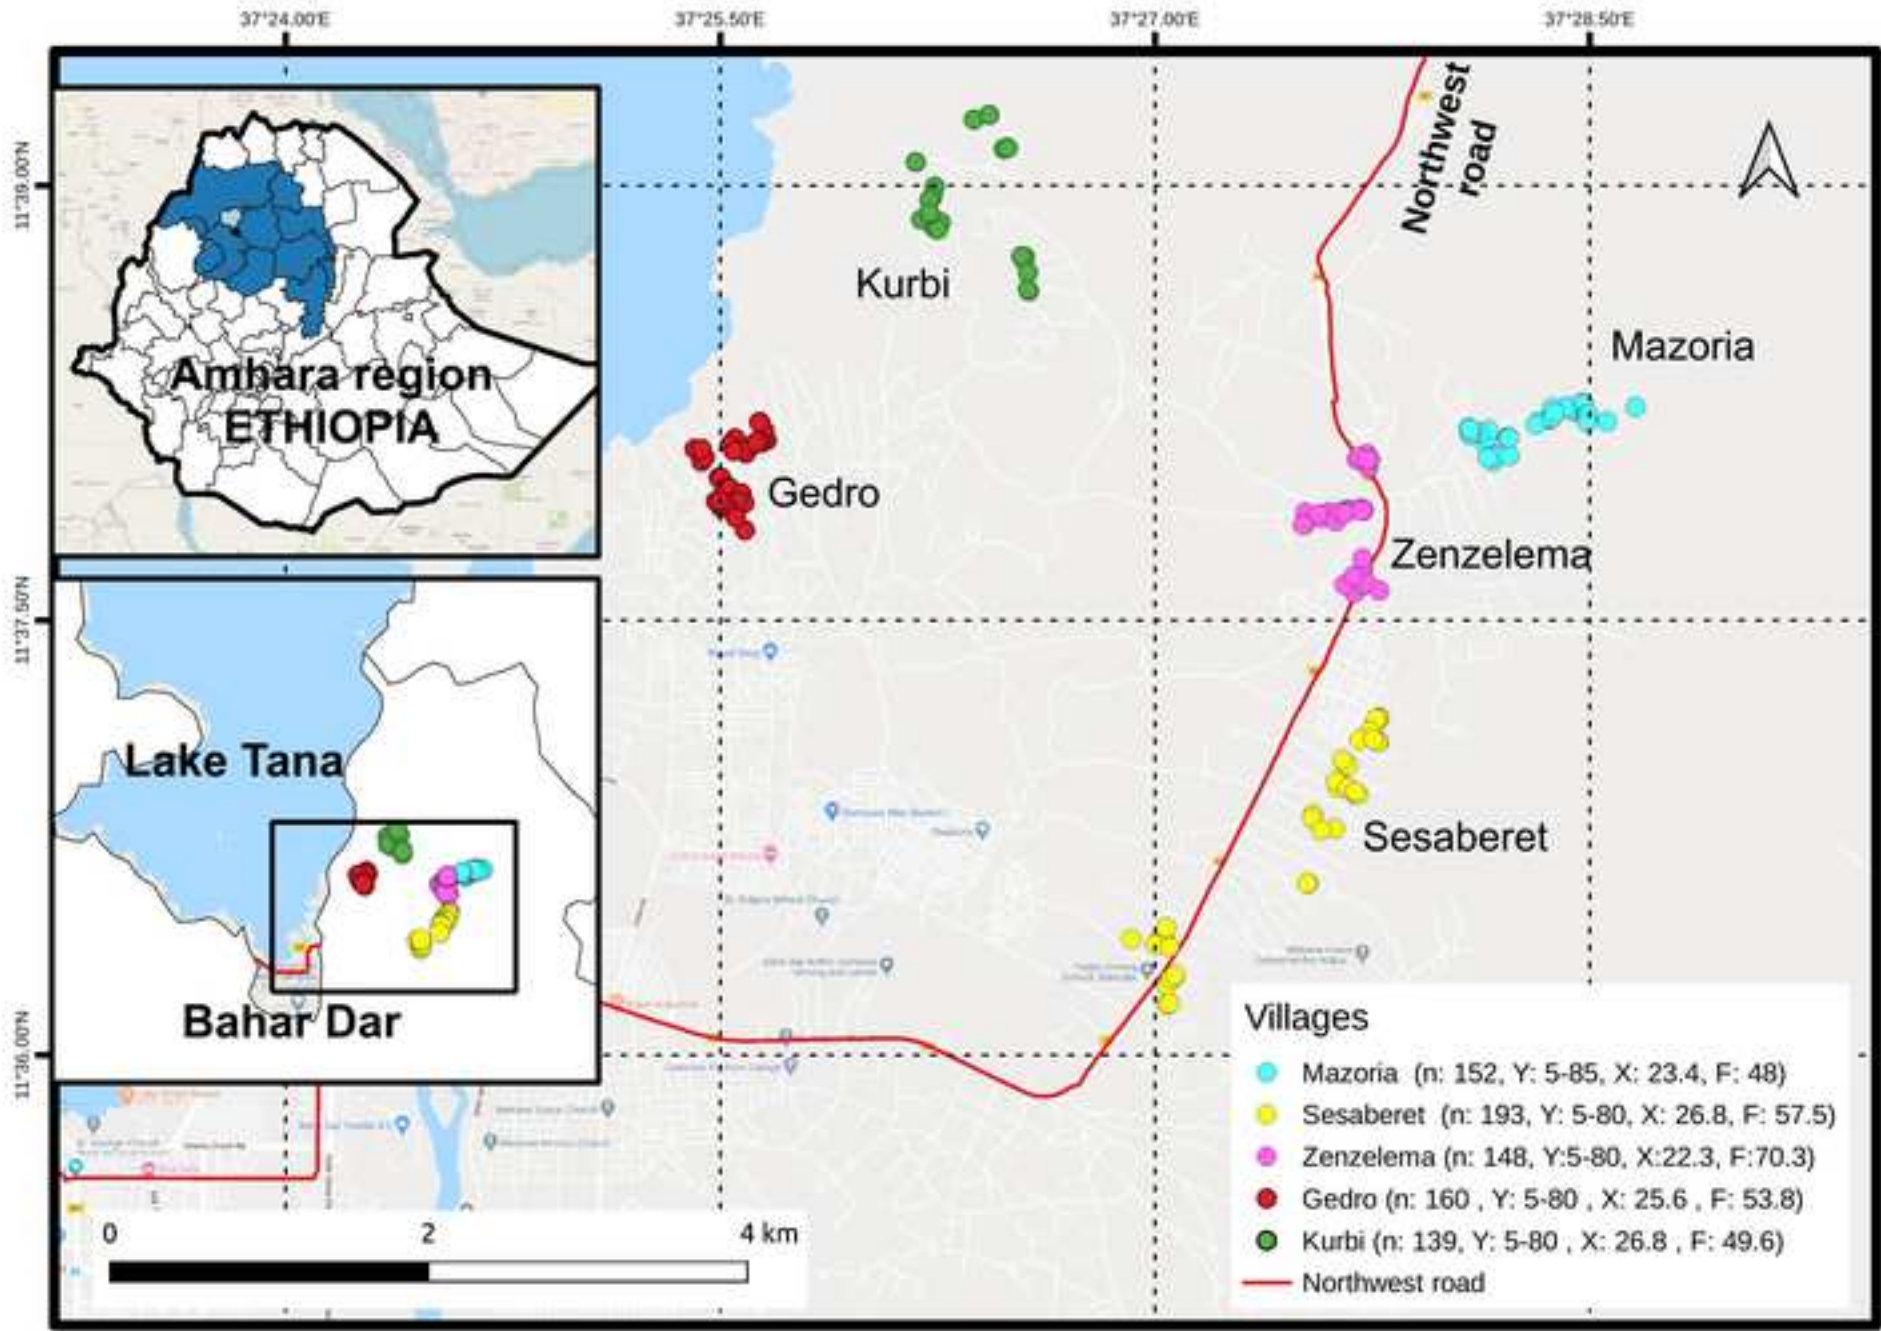

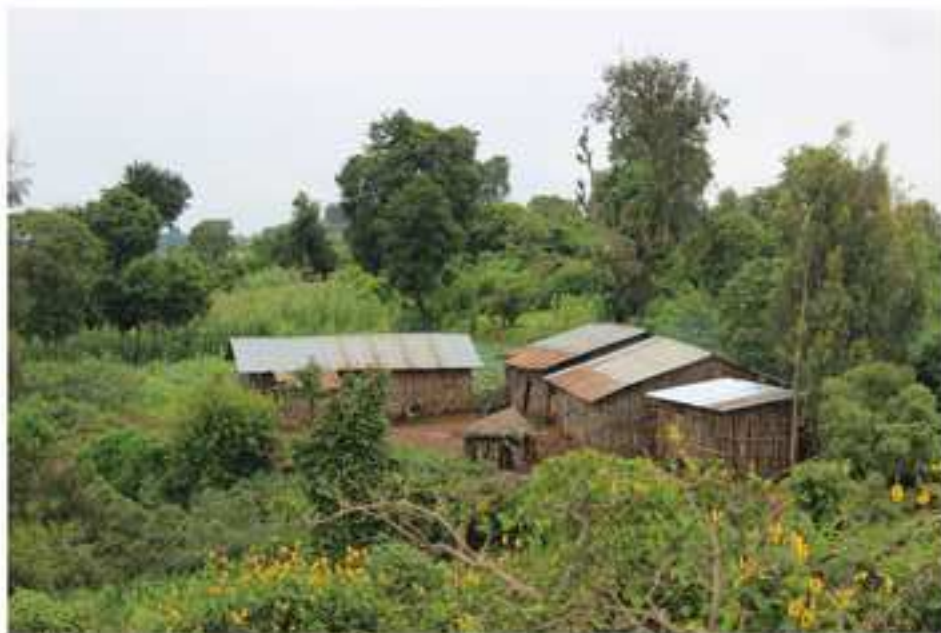

A

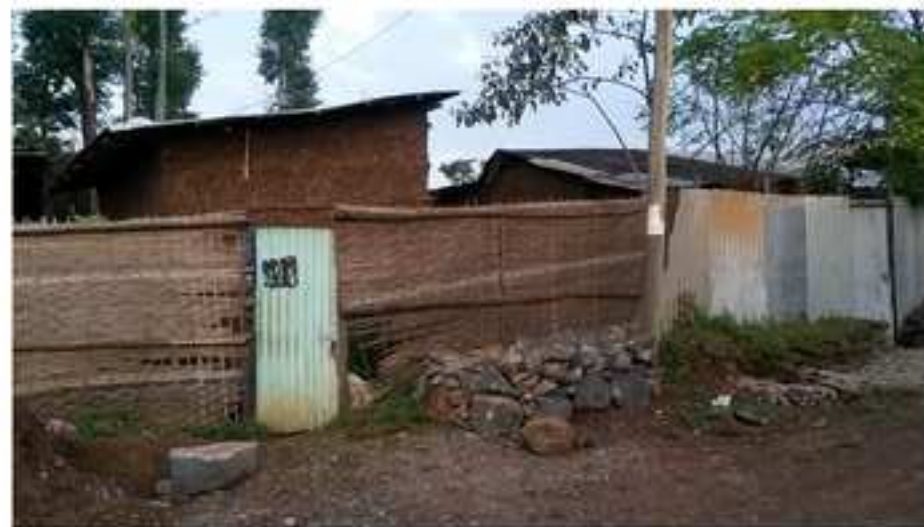

B

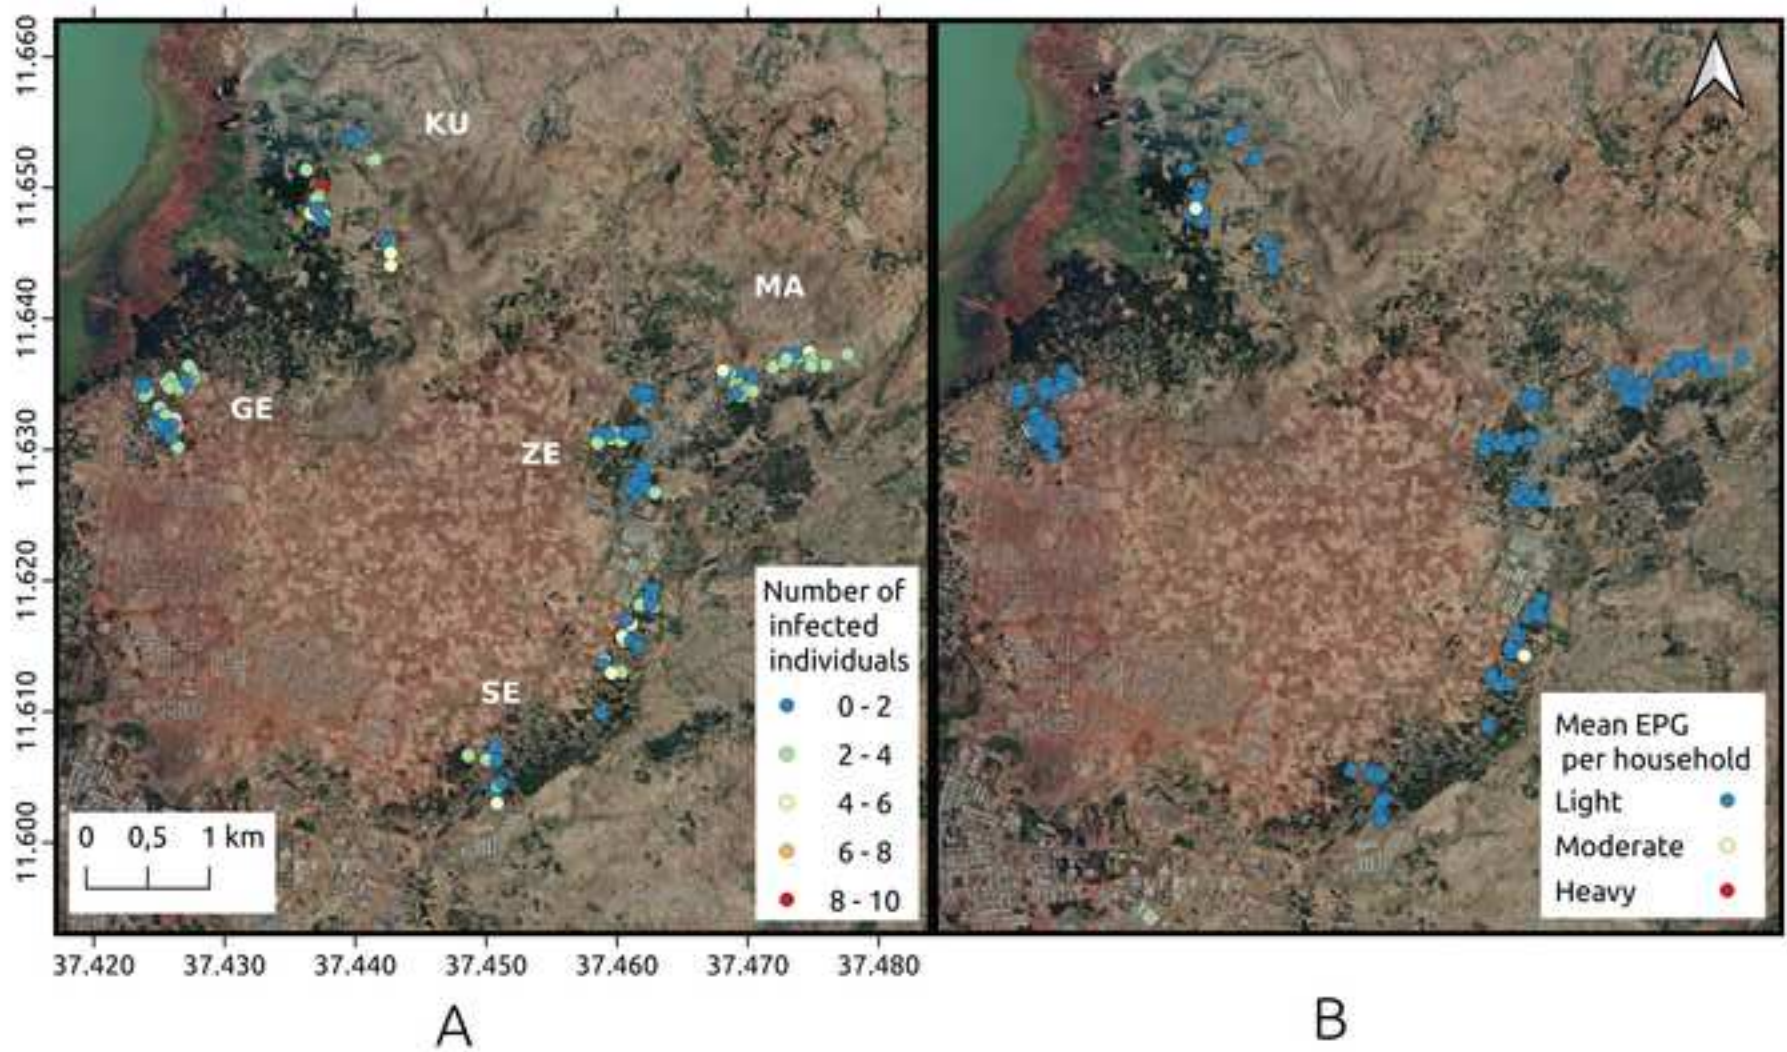

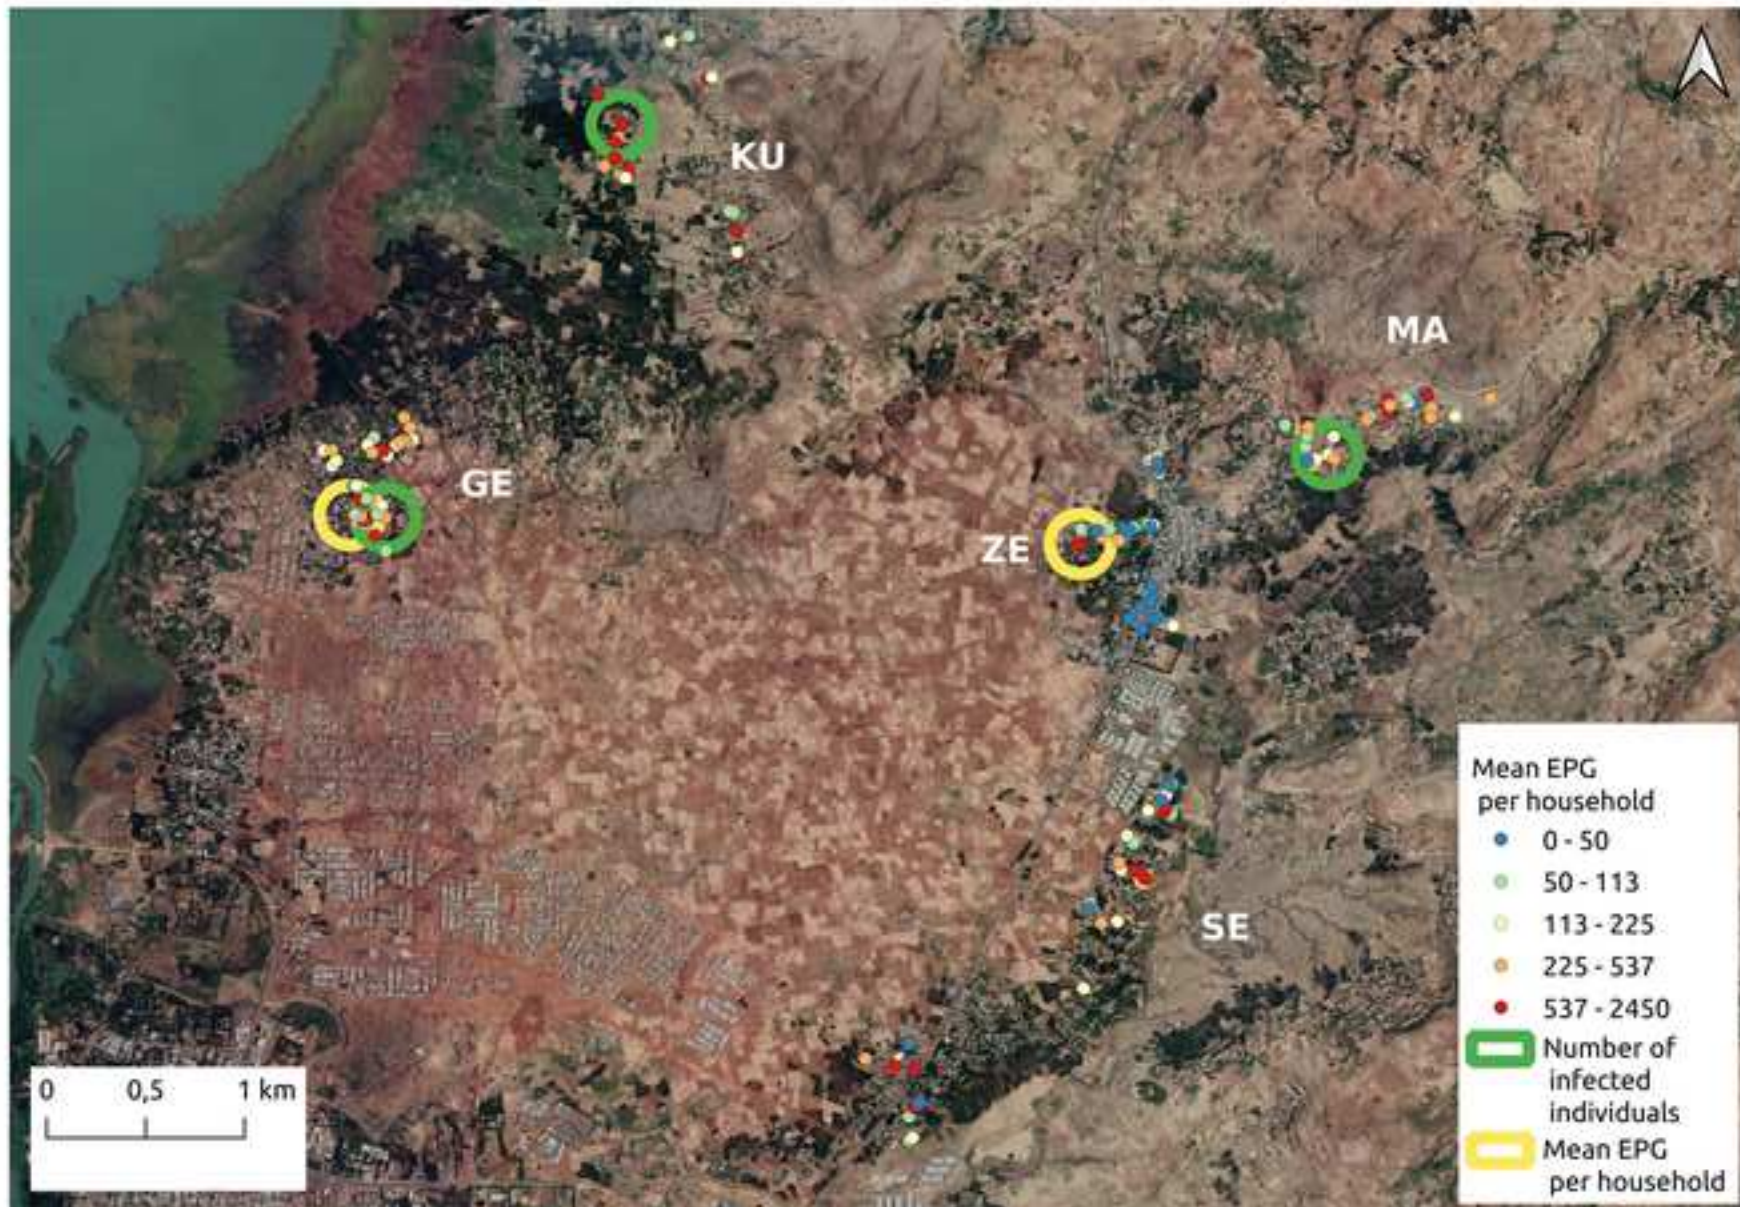

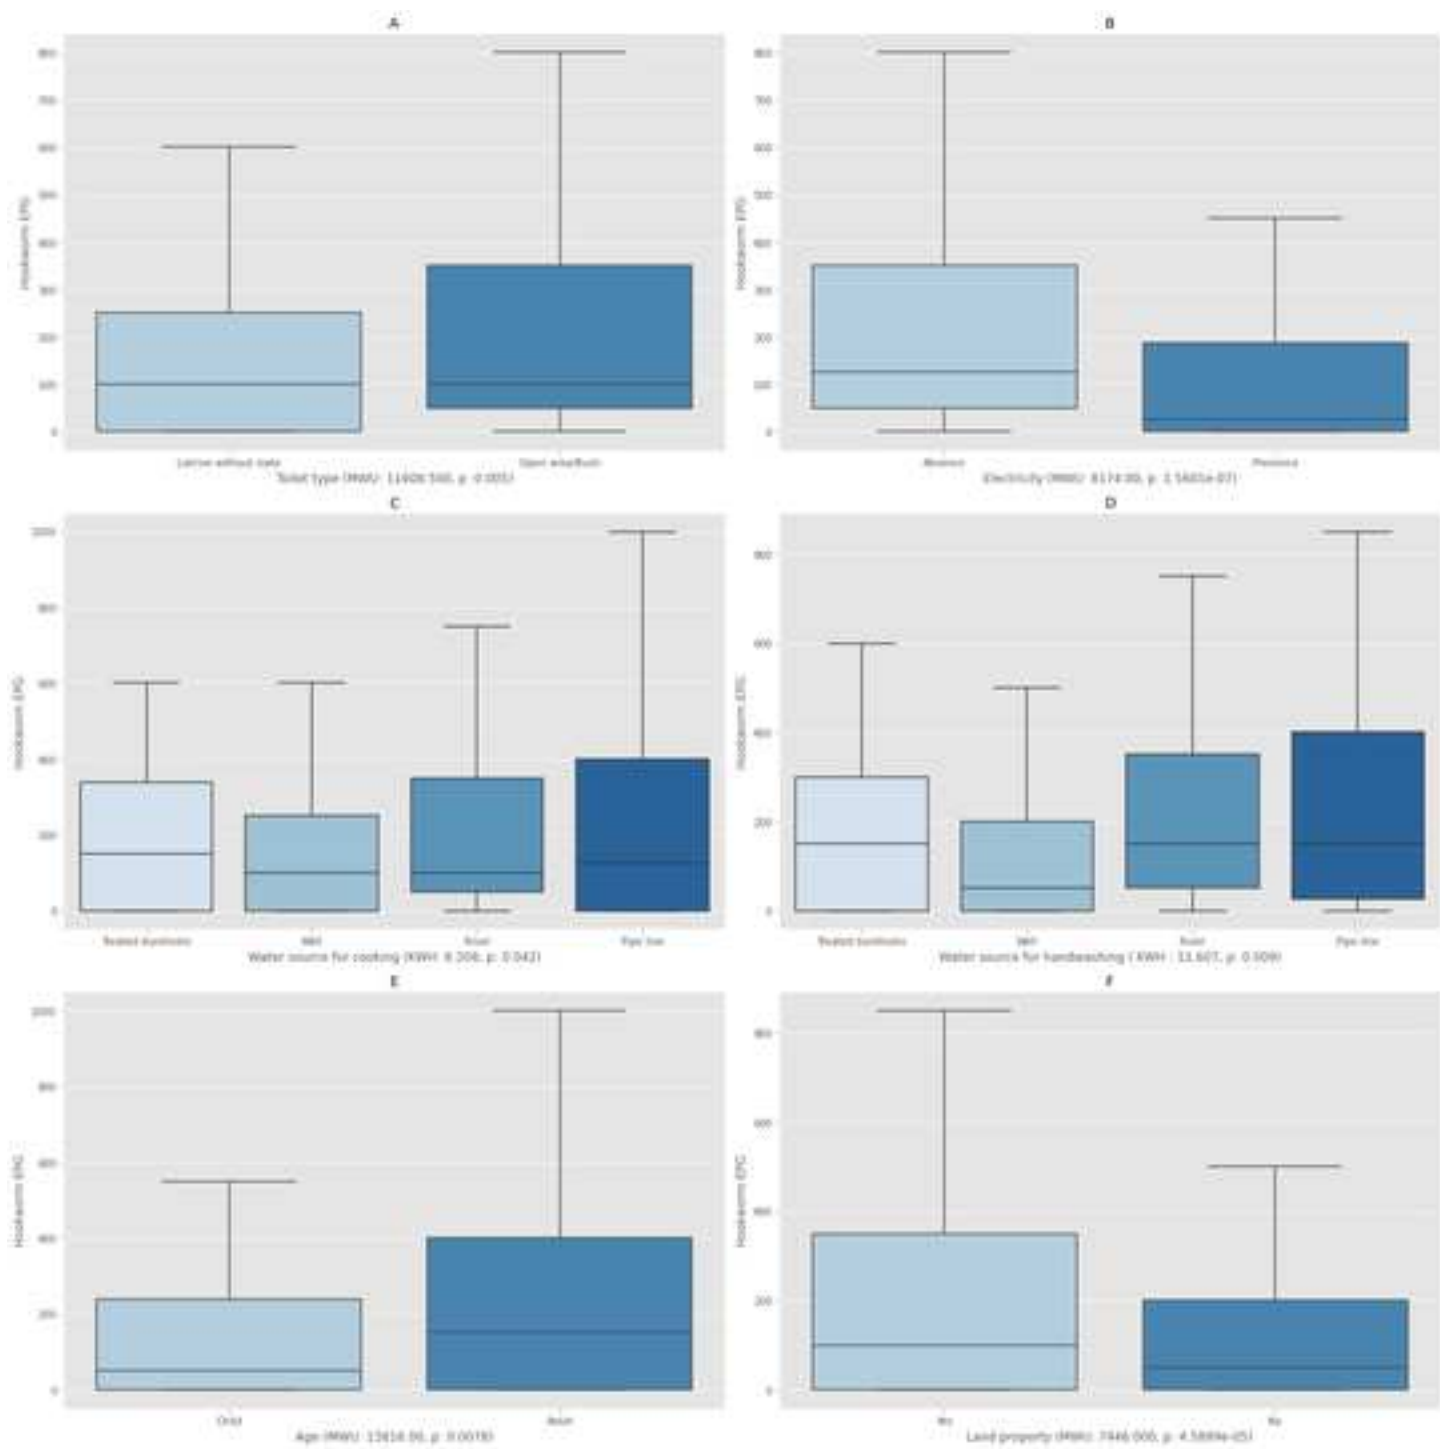

Figure 6

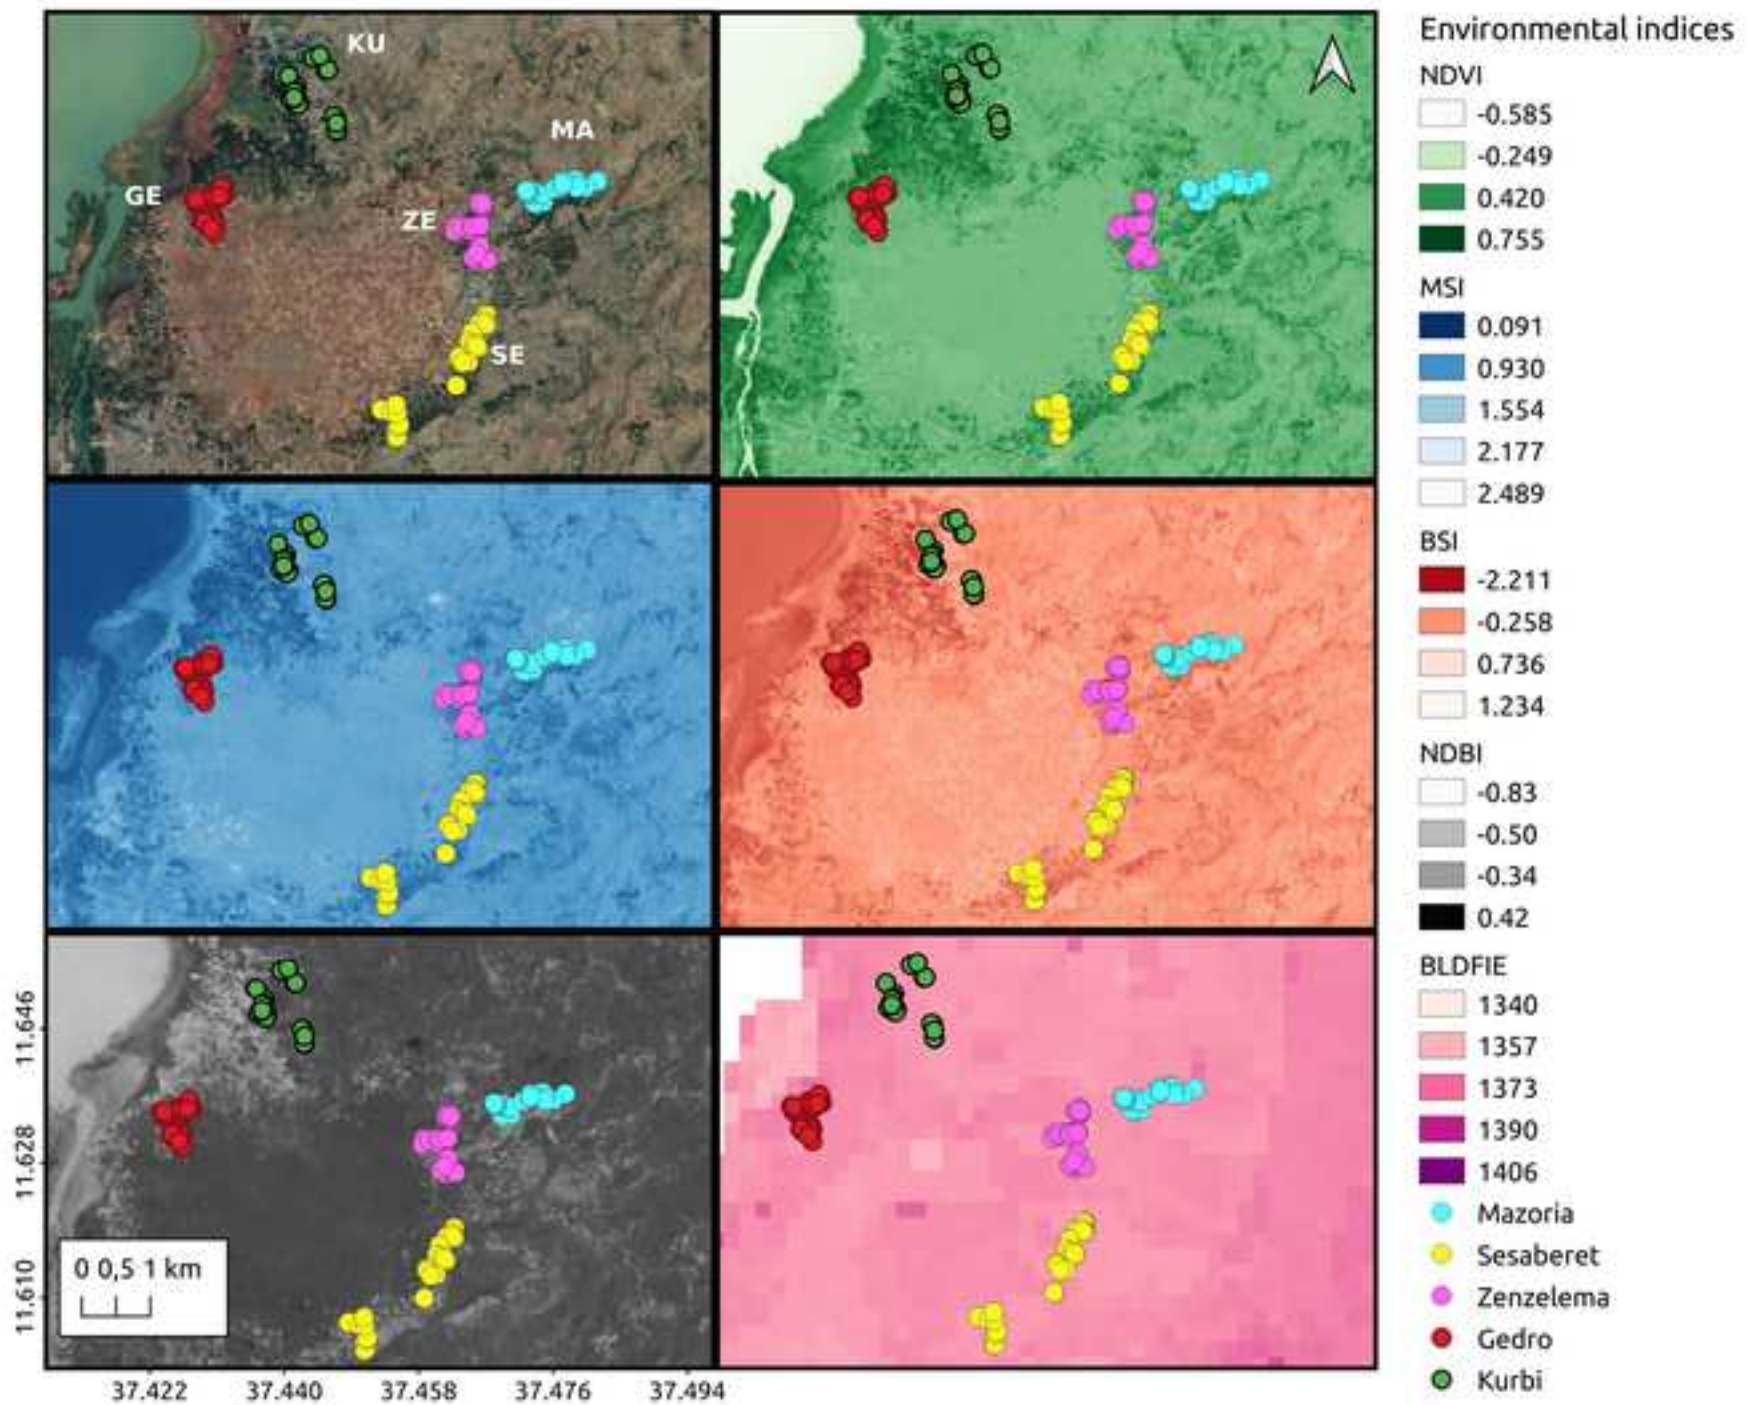



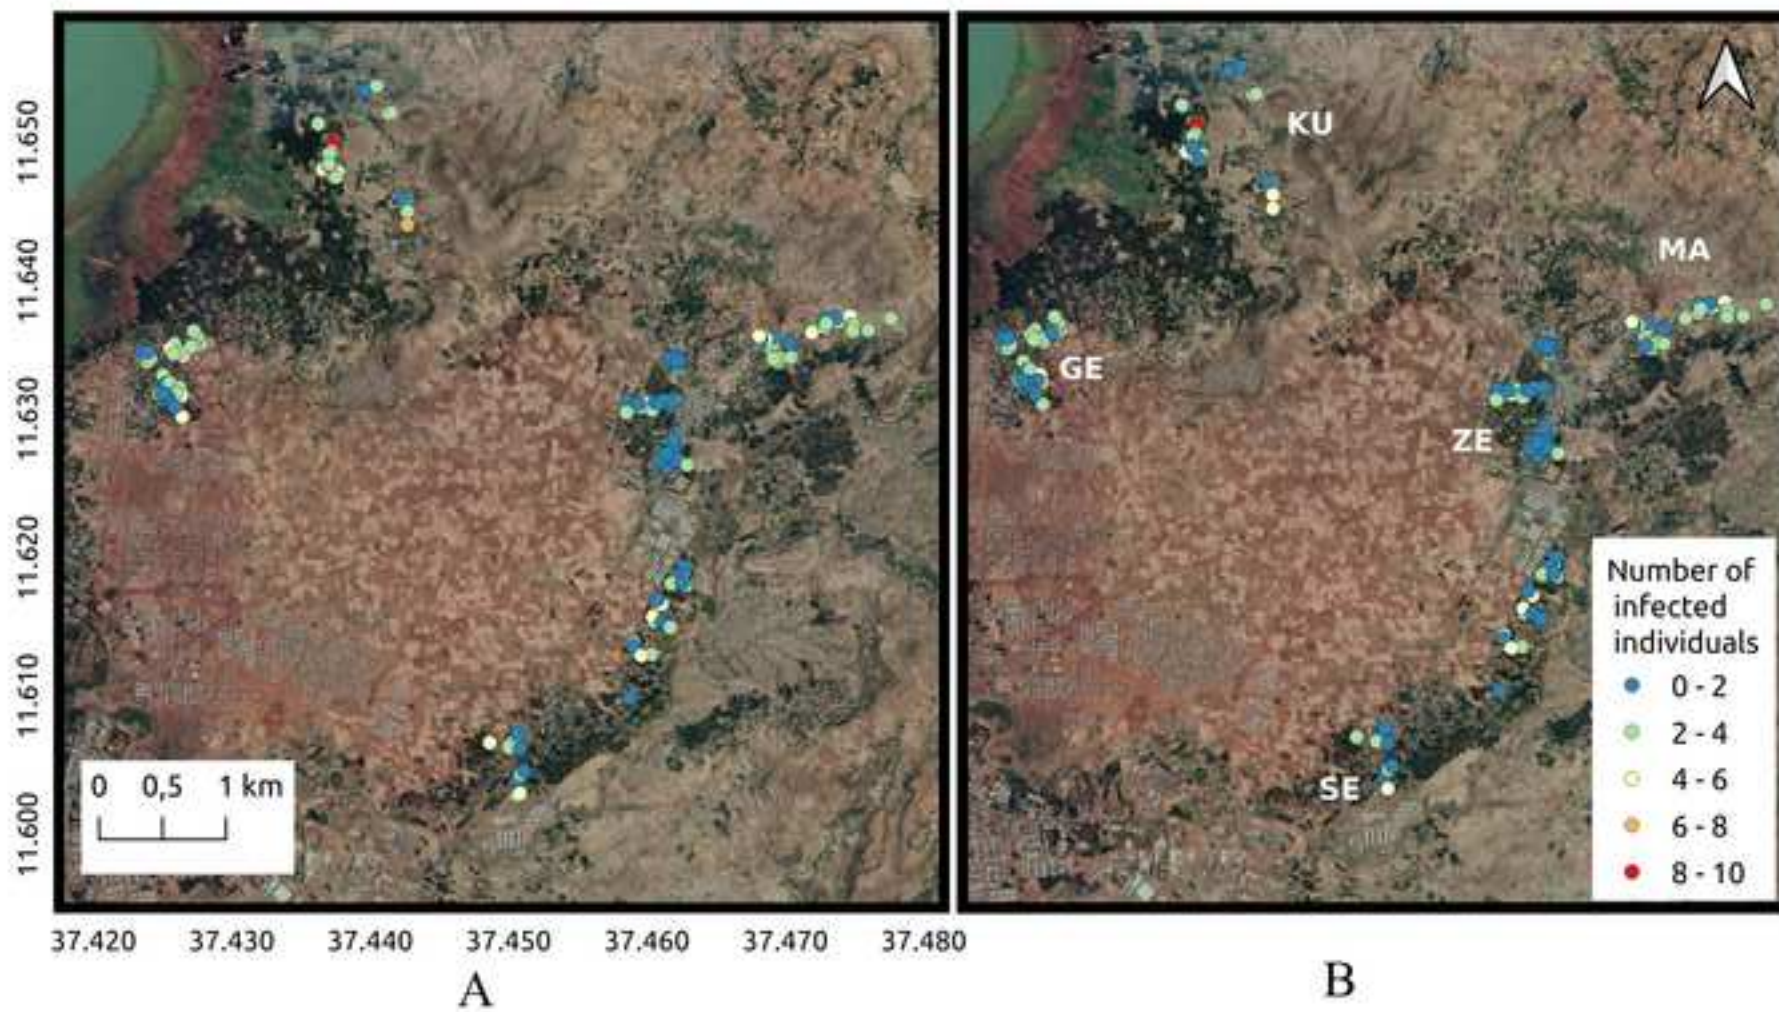

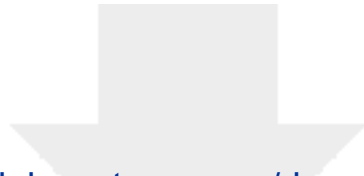

Click here to access/download  
**Supporting Information**  
Supplementary Table 1.docx

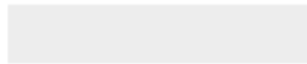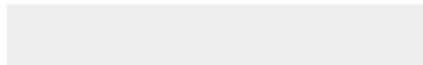

Supplement: pntd.0009466.s003.pdf [file pntd.0009466.s003.pdf]
